# Supplementary material for: A large-scale species level dated angiosperm phylogeny for evolutionary and ecological analyses
Source: PubMed Central journal article supplement (PMC6987248; doi:10.3897/bdj.8.e39677), 2020-01-21

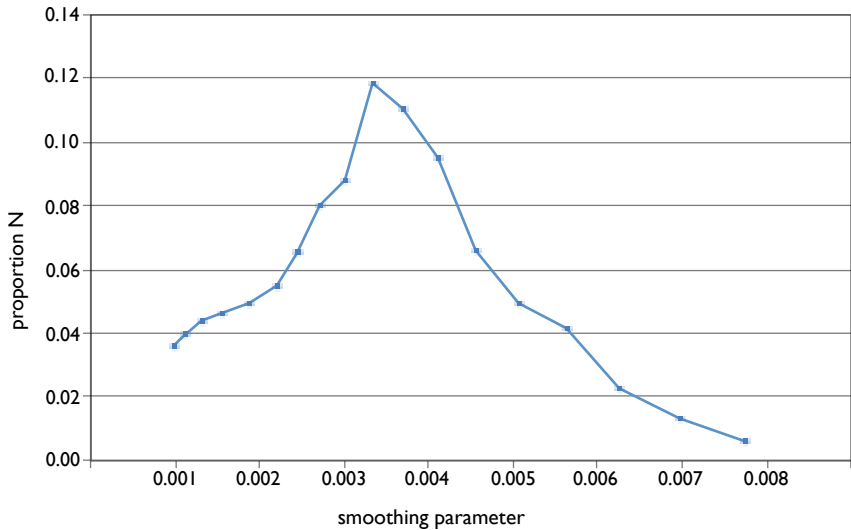

Supplement: bdj-08-e39677-s003.pdf [file bdj-08-e39677-s003.pdf]
