# Supplementary material for: A large-scale species level dated angiosperm phylogeny for evolutionary and ecological analyses
Source: Biodivers Data J. 2020 Jan 21;8:e39677. doi: 10.3897/BDJ.8.e39677 (PMC6987248; doi:10.3897/BDJ.8.e39677)
Supplement: Supplementary material 1 — Supplementary Table [file bdj-08-e39677-s001.xlsx]

## Sheet: Sheet1
SPECIES	GENUS	FAMILY	ORDER	matK GenBank n°	rbcL GenBank n°
Aa calceata	Aa	Orchidaceae	Asparagales	--	FJ571313
Aa colombiana	Aa	Orchidaceae	Asparagales	AM900802	AM778133
Aa hartwegii	Aa	Orchidaceae	Asparagales	AM900803	AM778134
Aa leucantha	Aa	Orchidaceae	Asparagales	--	FJ571311
Aa paleacea	Aa	Orchidaceae	Asparagales	EU214135	FJ571312
Abarema brachystachya	Abarema	Fabaceae	Fabales	KX374503	KF981222
Abarema jupunba	Abarema	Fabaceae	Fabales	KY046001	JQ626162
Abarema macradenia	Abarema	Fabaceae	Fabales	GQ981925	GQ981652
Abarema mataybifolia	Abarema	Fabaceae	Fabales	KY046006	JQ626142
Abatia parviflora	Abatia	Salicaceae	Malpighiales	EF135498	AF206726
Abdominea minimiflora	Abdominea	Orchidaceae	Asparagales	AB217524	--
Abelia chinensis	Abelia	Caprifoliaceae	Dipsacales	AY310461	HQ680737
Abelia mexicana	Abelia	Caprifoliaceae	Dipsacales	KP297537	KP297695
Abelia occidentalis	Abelia	Caprifoliaceae	Dipsacales	KP297528	KP297694
Abelia parvifolia	Abelia	Caprifoliaceae	Dipsacales	FJ745398	KP297677
Abelia uniflora	Abelia	Caprifoliaceae	Dipsacales	KP297541	HQ680735
Abeliophyllum distichum	Abeliophyllum	Oleaceae	Lamiales	MF407183	DQ673292
Abelmoschus esculentus	Abelmoschus	Malvaceae	Malvales	NC_035234	JN114778
Abelmoschus moschatus	Abelmoschus	Malvaceae	Malvales	MF349855	JQ230992
Abildgaardia hygrophila	Abildgaardia	Cyperaceae	Poales	--	AM999782
Abobra tenuifolia	Abobra	Cucurbitaceae	Cucurbitales	DQ536629	AF008961
Abolboda macrostachya	Abolboda	Xyridaceae	Poales	--	HQ182413
Abolboda poarchon	Abolboda	Xyridaceae	Poales	--	AJ419952
Abrophyllum ornans	Abrophyllum	Rousseaceae	Asterales	GQ983653	X87375
Abrotanella linearifolia	Abrotanella	Asteraceae	Asterales	AY929864	JQ933200
Abrus canescens*	Abrus	Fabaceae	Fabales	MN370283	MN366672
Abrus fruticulosus*	Abrus	Fabaceae	Fabales	MN370282	MN366673
Abrus precatorius	Abrus	Fabaceae	Fabales	KX119337	GU135185
Abuta grandifolia	Abuta	Menispermaceae	Ranunculales	KX384044	FJ026459
Abuta rufescens	Abuta	Menispermaceae	Ranunculales	JN051804	HQ260756
Abutilon angulatum	Abutilon	Malvaceae	Malvales	JX517944	JX572177
Abutilon indicum	Abutilon	Malvaceae	Malvales	MH767929	KF432068
Abutilon theophrasti	Abutilon	Malvaceae	Malvales	MH265201	HM849734
Acacia adenocalyx	Acacia	Fabaceae	Fabales	JX518166	JX572179
Acacia amythethophylla	Acacia	Fabaceae	Fabales	JX518139	JX572180
Acacia anegadensis	Acacia	Fabaceae	Fabales	HM020706	--
Acacia arenaria	Acacia	Fabaceae	Fabales	GQ872212	JX572181
Acacia assimilis	Acacia	Fabaceae	Fabales	LN885250	JX232068
Acacia ataxacantha	Acacia	Fabaceae	Fabales	KX119338	JX572183
Acacia aulacocarpa	Acacia	Fabaceae	Fabales	AF274214	--
Acacia aulacophylla	Acacia	Fabaceae	Fabales	LN885251	JX232128
Acacia auriculiformis	Acacia	Fabaceae	Fabales	KY607141	JX856621
Acacia baileyana	Acacia	Fabaceae	Fabales	JX517809	JX572184
Acacia bidwilli	Acacia	Fabaceae	Fabales	JX850068	--
Acacia binervata	Acacia	Fabaceae	Fabales	AF274218	--
Acacia bonariensis	Acacia	Fabaceae	Fabales	AF274146	KX640832
Acacia borleae	Acacia	Fabaceae	Fabales	GQ872214	JX572185
Acacia brevispica	Acacia	Fabaceae	Fabales	GQ872215	JF265244
Acacia burkei	Acacia	Fabaceae	Fabales	GQ872216	JX572186
Acacia calcicola	Acacia	Fabaceae	Fabales	AF274220	--
Acacia cambagei	Acacia	Fabaceae	Fabales	JX850060	--
Acacia catechu	Acacia	Fabaceae	Fabales	KX518642	GQ436355
Acacia caven	Acacia	Fabaceae	Fabales	MH324486	Z70145
Acacia centralis	Acacia	Fabaceae	Fabales	JQ587484	JQ591530
Acacia chariessa	Acacia	Fabaceae	Fabales	GQ872218	JX572188
Acacia chiapensis	Acacia	Fabaceae	Fabales	AY574097	--
Acacia colei	Acacia	Fabaceae	Fabales	AF525007	--
Acacia confusa	Acacia	Fabaceae	Fabales	LC386059	GQ436378
Acacia cultriformis	Acacia	Fabaceae	Fabales	AF274219	--
Acacia cyclops	Acacia	Fabaceae	Fabales	LN885258	JQ412305
Acacia davyi	Acacia	Fabaceae	Fabales	GQ872219	JF265247
Acacia diallaga	Acacia	Fabaceae	Fabales	LN885260	JX232116
Acacia drepanolobium	Acacia	Fabaceae	Fabales	MK290449	EU811868
Acacia dyeri	Acacia	Fabaceae	Fabales	JX517665	JX572189
Acacia elata	Acacia	Fabaceae	Fabales	AF274184	JX572190
Acacia eriocarpa	Acacia	Fabaceae	Fabales	GQ872220	JX572191
Acacia erubescens	Acacia	Fabaceae	Fabales	GQ872222	JF265248
Acacia exuvialis	Acacia	Fabaceae	Fabales	EU214207	EU213436
Acacia fasciculifera	Acacia	Fabaceae	Fabales	AF523159	KM896087
Acacia feddeana	Acacia	Fabaceae	Fabales	KY858983	--
Acacia ferruginea	Acacia	Fabaceae	Fabales	KX518640	JX195517
Acacia fleckii	Acacia	Fabaceae	Fabales	JX517897	JX572193
Acacia galpinii	Acacia	Fabaceae	Fabales	GQ872224	JX572194
Acacia gentlei	Acacia	Fabaceae	Fabales	HM020717	--
Acacia glaucoptera	Acacia	Fabaceae	Fabales	AF274217	--
Acacia glomerosa	Acacia	Fabaceae	Fabales	AF525000	--
Acacia goetzei	Acacia	Fabaceae	Fabales	JX517303	JX572196
Acacia grandicornuta	Acacia	Fabaceae	Fabales	GQ872227	JX572197
Acacia greggii	Acacia	Fabaceae	Fabales	MF963467	KY707179
Acacia haematoxylon	Acacia	Fabaceae	Fabales	AF523189	JX572198
Acacia harpophylla	Acacia	Fabaceae	Fabales	KM894642	KM895764
Acacia hebeclada	Acacia	Fabaceae	Fabales	GQ872229	JX572201
Acacia hereroensis	Acacia	Fabaceae	Fabales	JX517996	JX572202
Acacia hindsii	Acacia	Fabaceae	Fabales	AY574099	--
Acacia hirtipes	Acacia	Fabaceae	Fabales	HM020720	--
Acacia jibberdingensis	Acacia	Fabaceae	Fabales	LN885279	JX232159
Acacia kamerunensis*	Acacia	Fabaceae	Fabales	MN370268	MN366674
Acacia karina	Acacia	Fabaceae	Fabales	LN885281	JX232144
Acacia karroo	Acacia	Fabaceae	Fabales	GQ872230	AM235003
Acacia kirkii	Acacia	Fabaceae	Fabales	GQ872231	JX572204
Acacia kosiensis	Acacia	Fabaceae	Fabales	GQ872232	JX572205
Acacia kraussiana	Acacia	Fabaceae	Fabales	GQ872233	JX572206
Acacia leiocalyx	Acacia	Fabaceae	Fabales	AF274216	--
Acacia lenticularis	Acacia	Fabaceae	Fabales	--	JX856623
Acacia leucoclada	Acacia	Fabaceae	Fabales	AF274212	--
Acacia leucophloea	Acacia	Fabaceae	Fabales	KX518639	JX195515
Acacia ligulata	Acacia	Fabaceae	Fabales	AF274225	NC_026134
Acacia lineata	Acacia	Fabaceae	Fabales	AF523162	--
Acacia longifolia	Acacia	Fabaceae	Fabales	FJ711528	HM849735
Acacia luederitzii	Acacia	Fabaceae	Fabales	GQ872234	JF265253
Acacia lysiphloia	Acacia	Fabaceae	Fabales	AF274192	--
Acacia mayana	Acacia	Fabaceae	Fabales	HM020722	--
Acacia mearnsii	Acacia	Fabaceae	Fabales	HM020723	JX572209
Acacia melanoxylon	Acacia	Fabaceae	Fabales	FJ711538	HM849736
Acacia mellifera	Acacia	Fabaceae	Fabales	MK290434	JX572211
Acacia microbotrya	Acacia	Fabaceae	Fabales	AF274201	--
Acacia modesta	Acacia	Fabaceae	Fabales	MF694817	JX856624
Acacia monticola	Acacia	Fabaceae	Fabales	AF274193	--
Acacia myrtifolia	Acacia	Fabaceae	Fabales	AF523147	--
Acacia nebrownii	Acacia	Fabaceae	Fabales	GQ872236	JX572215
Acacia neovernicosa	Acacia	Fabaceae	Fabales	AF524990	JN796927
Acacia nilotica	Acacia	Fabaceae	Fabales	MK290452	KC417042
Acacia nuperrima	Acacia	Fabaceae	Fabales	AF274204	--
Acacia ormocarpoides	Acacia	Fabaceae	Fabales	GQ872239	JX572218
Acacia pachycarpa	Acacia	Fabaceae	Fabales	AF274194	--
Acacia parramattensis	Acacia	Fabaceae	Fabales	AF274187	--
Acacia pennata	Acacia	Fabaceae	Fabales	AB924696	AB925831
Acacia pennatula	Acacia	Fabaceae	Fabales	MH324480	JQ592084
Acacia penninervis	Acacia	Fabaceae	Fabales	AF523155	--
Acacia platycarpa	Acacia	Fabaceae	Fabales	AF525005	--
Acacia podalyriifolia	Acacia	Fabaceae	Fabales	AF523134	JX572219
Acacia ramulosa	Acacia	Fabaceae	Fabales	LN885301	JX232091
Acacia reficiens	Acacia	Fabaceae	Fabales	GQ872242	JX572220
Acacia rehmanniana	Acacia	Fabaceae	Fabales	GQ872243	JX572221
Acacia reniformis	Acacia	Fabaceae	Fabales	HM020725	--
Acacia retivenea	Acacia	Fabaceae	Fabales	AF274224	--
Acacia riograndensis	Acacia	Fabaceae	Fabales	KY858986	--
Acacia robusta	Acacia	Fabaceae	Fabales	GQ872245	JX572222
Acacia robynsiana	Acacia	Fabaceae	Fabales	JX517895	JX572224
Acacia rossei	Acacia	Fabaceae	Fabales	AF274195	--
Acacia schottii	Acacia	Fabaceae	Fabales	AF524991	--
Acacia schweinfurthii	Acacia	Fabaceae	Fabales	GQ872246	JF265257
Acacia sekhukhuniensis	Acacia	Fabaceae	Fabales	GQ872247	JX572226
Acacia senegal	Acacia	Fabaceae	Fabales	KX119342	JX572227
Acacia seyal	Acacia	Fabaceae	Fabales	MK290433	MH630252
Acacia sibina	Acacia	Fabaceae	Fabales	LN885316	JX232103
Acacia siculiformis	Acacia	Fabaceae	Fabales	AF523164	--
Acacia sieberiana	Acacia	Fabaceae	Fabales	KX119343	JF265259
Acacia spectabilis	Acacia	Fabaceae	Fabales	AF274213	--
Acacia sphaerocephala	Acacia	Fabaceae	Fabales	HM020729	--
Acacia stuhlmannii	Acacia	Fabaceae	Fabales	GQ872251	JX572230
Acacia suaveolens	Acacia	Fabaceae	Fabales	AF274221	--
Acacia swazica	Acacia	Fabaceae	Fabales	GQ872252	JF265260
Acacia tetragonophylla	Acacia	Fabaceae	Fabales	LN885323	JX232083
Acacia theronii	Acacia	Fabaceae	Fabales	JX517894	JX572231
Acacia torrei	Acacia	Fabaceae	Fabales	JX518215	JX572232
Acacia tortilis	Acacia	Fabaceae	Fabales	MK290547	EU213441
Acacia tortuosa	Acacia	Fabaceae	Fabales	HM020730	KJ082630
Acacia translucens	Acacia	Fabaceae	Fabales	AF525004	--
Acacia umbraculiformis	Acacia	Fabaceae	Fabales	LN885325	JX232105
Acacia victoriae	Acacia	Fabaceae	Fabales	MF828474	MF828457
Acacia villosa	Acacia	Fabaceae	Fabales	KX119344	JQ592108
Acacia welwitschii	Acacia	Fabaceae	Fabales	GQ872254	JX572234
Acacia willardiana	Acacia	Fabaceae	Fabales	AY386898	--
Acacia woodmaniorum	Acacia	Fabaceae	Fabales	LN885328	JX232141
Acacia wrightii	Acacia	Fabaceae	Fabales	AF274148	--
Acacia xanthophloea	Acacia	Fabaceae	Fabales	MK290529	JF265263
Acaciella angustissima	Acaciella	Fabaceae	Fabales	EU025882	KX385927
Acaciella chamelensis	Acaciella	Fabaceae	Fabales	HM020734	--
Acaciella glauca	Acaciella	Fabaceae	Fabales	EU812042	EU811871
Acaciella tequilana	Acaciella	Fabaceae	Fabales	EU812044	EU811873
Acalypha californica	Acalypha	Euphorbiaceae	Malpighiales	EF135499	AY794943
Acalypha chirindica	Acalypha	Euphorbiaceae	Malpighiales	JX518178	JX572236
Acalypha ciliata	Acalypha	Euphorbiaceae	Malpighiales	--	KF425771
Acalypha diversifolia	Acalypha	Euphorbiaceae	Malpighiales	--	JQ591362
Acalypha glabrata	Acalypha	Euphorbiaceae	Malpighiales	JX518120	JF265264
Acalypha hispida	Acalypha	Euphorbiaceae	Malpighiales	LN554250	JQ083081
Acalypha insulana	Acalypha	Euphorbiaceae	Malpighiales	AB233750	AB233854
Acalypha macrostachya	Acalypha	Euphorbiaceae	Malpighiales	LK021353	JQ591369
Acalypha mortoniana	Acalypha	Euphorbiaceae	Malpighiales	JQ587424	JQ591370
Acalypha platyphylla	Acalypha	Euphorbiaceae	Malpighiales	--	AY794942
Acalypha rhomboidea	Acalypha	Euphorbiaceae	Malpighiales	KP643092	U00435
Acalypha schiedeana	Acalypha	Euphorbiaceae	Malpighiales	LK021360	JQ591379
Acalypha wilkesiana	Acalypha	Euphorbiaceae	Malpighiales	--	JX571772
Acampe ochracea	Acampe	Orchidaceae	Asparagales	KY966700	KF421859
Acampe praemorsa	Acampe	Orchidaceae	Asparagales	EU214214	JN005359
Acanthocalycium spiniflorum	Acanthocalycium	Cactaceae	Caryophyllales	HM041644	--
Acanthocarpus preissii	Acanthocarpus	Asparagaceae	Asparagales	JX903591	JX903182
Acanthocereus tetragonus	Acanthocereus	Cactaceae	Caryophyllales	KU597916	--
Acanthochlamys bracteata	Acanthochlamys	Velloziaceae	Pandanales	KU127338	HQ845619
Acanthocladium dockeri	Acanthocladium	Asteraceae	Asterales	AF318901	--
Acanthocladus guayaquilensis	Acanthocladus	Polygalaceae	Fabales	--	AM234190
Acanthogilia gloriosa	Acanthogilia	Polemoniaceae	Ericales	L48562	AY725863
Acantholimon acerosum	Acantholimon	Plumbaginaceae	Caryophyllales	--	Z97639
Acantholimon lycopodioides	Acantholimon	Plumbaginaceae	Caryophyllales	FN597642	--
Acanthophippium mantinianum	Acanthophippium	Orchidaceae	Asparagales	AF263618	AF074100
Acanthophippium sylhetense	Acanthophippium	Orchidaceae	Asparagales	KY966703	--
Acanthophoenix rubra	Acanthophoenix	Arecoideae	Arecales	AM114691	AM110234
Acanthophyllum sordidum	Acanthophyllum	Caryophyllaceae	Caryophyllales	AY936324	--
Acanthoprasium frutescens	Acanthoprasium	Lamiaceae	Lamiales	HQ911487	--
Acanthoprasium integrifolium	Acanthoprasium	Lamiaceae	Lamiales	HQ911486	--
Acanthopsis spathularis	Acanthopsis	Acanthaceae	Lamiales	--	KF724239
Acanthosicyos horridus	Acanthosicyos	Cucurbitaceae	Cucurbitales	DQ536630	DQ535778
Acanthosicyos naudinianus	Acanthosicyos	Cucurbitaceae	Cucurbitales	EU436399	--
Acanthospermum australe	Acanthospermum	Asteraceae	Asterales	AY215757	AY215077
Acanthospermum hispidum	Acanthospermum	Asteraceae	Asterales	MK285014	MG224060
Acanthostachys pitcairnioides	Acanthostachys	Bromeliaceae	Poales	KU258017	JX649328
Acanthostachys strobilacea	Acanthostachys	Bromeliaceae	Poales	KU258018	JF280677
Acanthus ebracteatus	Acanthus	Acanthaceae	Lamiales	KX231340	AY289682
Acanthus mollis	Acanthus	Acanthaceae	Lamiales	HM850911	HM849737
Acanthus montanus	Acanthus	Acanthaceae	Lamiales	HQ384511	L12592
Acca sellowiana	Acca	Myrtaceae	Myrtales	MF954517	JX571773
Acer acuminatum	Acer	Aceraceae	Sapindales	--	DQ978393
Acer argutum	Acer	Aceraceae	Sapindales	AB872505	DQ978394
Acer barbinerve	Acer	Aceraceae	Sapindales	--	DQ978395
Acer buergerianum	Acer	Aceraceae	Sapindales	NC_034744	DQ978396
Acer caesium	Acer	Aceraceae	Sapindales	MH116491	DQ978397
Acer campbellii	Acer	Aceraceae	Sapindales	KX494365	DQ978398
Acer campestre	Acer	Aceraceae	Sapindales	MG220950	DQ978399
Acer carpinifolium	Acer	Aceraceae	Sapindales	AB872508	DQ978400
Acer caudatum	Acer	Aceraceae	Sapindales	--	DQ978401
Acer circinatum	Acer	Aceraceae	Sapindales	KX677637	DQ978403
Acer cissifolium	Acer	Aceraceae	Sapindales	AB872509	DQ978404
Acer crataegifolium	Acer	Aceraceae	Sapindales	AB872510	DQ978405
Acer davidii	Acer	Aceraceae	Sapindales	MK193787	DQ978406
Acer diabolicum	Acer	Aceraceae	Sapindales	AB872511	DQ978407
Acer distylum	Acer	Aceraceae	Sapindales	AB872512	DQ978408
Acer elegantulum	Acer	Aceraceae	Sapindales	KU902563	HQ427191
Acer erianthum	Acer	Aceraceae	Sapindales	--	DQ978409
Acer fabri	Acer	Aceraceae	Sapindales	KU902525	EF186772
Acer glabrum	Acer	Aceraceae	Sapindales	KX677595	DQ978410
Acer griseum	Acer	Aceraceae	Sapindales	NC_034346	DQ978411
Acer henryi	Acer	Aceraceae	Sapindales	MF350233	DQ987821
Acer laevigatum	Acer	Aceraceae	Sapindales	KU902556	DQ978412
Acer laurinum	Acer	Aceraceae	Sapindales	KR530246	DQ978413
Acer lobelii	Acer	Aceraceae	Sapindales	--	FN689360
Acer macrophyllum	Acer	Aceraceae	Sapindales	KX677477	DQ978414
Acer maximowiczianum	Acer	Aceraceae	Sapindales	KU902526	DQ978415
Acer monspessulanum	Acer	Aceraceae	Sapindales	KU549987	FN689377
Acer negundo	Acer	Aceraceae	Sapindales	KX677358	DQ978417
Acer nipponicum	Acer	Aceraceae	Sapindales	AB872520	DQ978418
Acer oblongum	Acer	Aceraceae	Sapindales	KX264942	DQ978419
Acer olivaceum	Acer	Aceraceae	Sapindales	KU902523	HQ427190
Acer opalus	Acer	Aceraceae	Sapindales	KU550000	FN689359
Acer palmatum	Acer	Aceraceae	Sapindales	NC_034932	DQ978421
Acer pectinatum	Acer	Aceraceae	Sapindales	MH116499	JF940632
Acer pentaphyllum	Acer	Aceraceae	Sapindales	KU902533	DQ978422
Acer pilosum	Acer	Aceraceae	Sapindales	KP088942	DQ978423
Acer platanoides	Acer	Aceraceae	Sapindales	KX677002	DQ978424
Acer pseudoplatanus	Acer	Aceraceae	Sapindales	MG220785	DQ978425
Acer pseudosieboldianum	Acer	Aceraceae	Sapindales	KU902561	DQ978426
Acer pycnanthum	Acer	Aceraceae	Sapindales	AB872526	DQ978427
Acer rubrum	Acer	Aceraceae	Sapindales	MK509364	DQ459381
Acer rufinerve	Acer	Aceraceae	Sapindales	AB872527	DQ978429
Acer saccharinum	Acer	Aceraceae	Sapindales	MK509365	EU676893
Acer saccharum	Acer	Aceraceae	Sapindales	MK509366	DQ978432
Acer sieboldianum	Acer	Aceraceae	Sapindales	AB872529	DQ978433
Acer spicatum	Acer	Aceraceae	Sapindales	MK509367	DQ978434
Acer stachyophyllum	Acer	Aceraceae	Sapindales	MH116502	DQ987822
Acer sterculiaceum	Acer	Aceraceae	Sapindales	KU902564	DQ978435
Acer tataricum	Acer	Aceraceae	Sapindales	KX264946	DQ978436
Acer tegmentosum	Acer	Aceraceae	Sapindales	KU902540	DQ978437
Acer trautvetteri	Acer	Aceraceae	Sapindales	--	DQ978438
Acer truncatum	Acer	Aceraceae	Sapindales	MF996341	DQ978439
Acer tschonoskii	Acer	Aceraceae	Sapindales	AB872531	DQ978440
Aceratium ferrugineum	Aceratium	Elaeocarpaceae	Oxalidales	--	L28947
Aceratium oppositifolium	Aceratium	Elaeocarpaceae	Oxalidales	--	FJ976116
Acharia tragodes	Acharia	Achariaceae	Malpighiales	EF135500	AF206728
Achatocarpus praecox	Achatocarpus	Achatocarpaceae	Caryophyllales	MG833418	AY270142
Achillea collina	Achillea	Asteraceae	Asterales	HE967336	HE963307
Achillea filipendulina	Achillea	Asteraceae	Asterales	--	AB530950
Achillea maritima	Achillea	Asteraceae	Asterales	JN893914	--
Achillea ptarmica	Achillea	Asteraceae	Asterales	MK509369	JN893432
Achillea wilsoniana	Achillea	Asteraceae	Asterales	HM989802	GQ436490
Achimenes admirabilis	Achimenes	Gesneriaceae	Lamiales	JX195949	AJ439982
Achimenes candida	Achimenes	Gesneriaceae	Lamiales	JQ587952	JQ592147
Achlys japonica	Achlys	Berberidaceae	Ranunculales	KM980523	KM980530
Achlys triphylla	Achlys	Berberidaceae	Ranunculales	MH423064	L75868
Achyranthes arborescens	Achyranthes	Amaranthaceae	Caryophyllales	AY042534	AY042534
Achyranthes aspera	Achyranthes	Amaranthaceae	Caryophyllales	MH767766	AY270048
Achyranthes bidentata	Achyranthes	Amaranthaceae	Caryophyllales	LT992574	GQ436715
Achyropsis leptostachya	Achyropsis	Amaranthaceae	Caryophyllales	AY998117	--
Achyrospermum africanum	Achyrospermum	Lamiaceae	Lamiales	HQ911418	--
Achyrospermum carvalhoi	Achyrospermum	Lamiaceae	Lamiales	HQ911412	--
Achyrospermum cryptanthum	Achyrospermum	Lamiaceae	Lamiales	HQ911415	--
Achyrospermum fruticosum	Achyrospermum	Lamiaceae	Lamiales	HQ911420	--
Achyrospermum parviflorum	Achyrospermum	Lamiaceae	Lamiales	HQ911417	--
Achyrospermum schimperi	Achyrospermum	Lamiaceae	Lamiales	HQ911416	--
Acianthera decipiens	Acianthera	Orchidaceae	Asparagales	KY218755	--
Acianthera sicaria	Acianthera	Orchidaceae	Asparagales	AF302648	--
Acianthus caudatus	Acianthus	Orchidaceae	Asparagales	AJ309990	--
Acianthus confusus	Acianthus	Orchidaceae	Asparagales	AJ309999	--
Acianthus cymbalariifolius	Acianthus	Orchidaceae	Asparagales	AJ309992	--
Acianthus exsertus	Acianthus	Orchidaceae	Asparagales	AJ309993	AF074101
Acianthus fornicatus	Acianthus	Orchidaceae	Asparagales	AJ309994	--
Acicarpha tribuloides	Acicarpha	Calyceraceae	Asterales	EU841362	EU841134
Acidocroton trichophyllus	Acidocroton	Euphorbiaceae	Malpighiales	--	EF405827
Acidosasa purpurea	Acidosasa	Poaceae	Poales	HQ337793	HQ337793
Acidoton nicaraguensis	Acidoton	Euphorbiaceae	Malpighiales	LK021445	JQ591390
Acidoton urens	Acidoton	Euphorbiaceae	Malpighiales	AB268017	AB267913
Acineta barkeri	Acineta	Orchidaceae	Asparagales	JN589953	JN589973
Acineta chrysantha	Acineta	Orchidaceae	Asparagales	KF660281	AF074102
Acineta superba	Acineta	Orchidaceae	Asparagales	AF239475	--
Acioa guianensis	Acioa	Chrysobalanaceae	Malpighiales	NC_030534	GQ424473
Aciotis rubricaulis	Aciotis	Melastomataceae	Myrtales	--	JQ592642
Aciphylla aurea	Aciphylla	Apiaceae	Apiales	U58541	AY188411
Aciphylla glacialis	Aciphylla	Apiaceae	Apiales	--	JQ933204
Acis autumnalis	Acis	Amaryllidaceae	Asparagales	AY101317	Z77256
Acis nicaeensis	Acis	Amaryllidaceae	Asparagales	KX018279	--
Acis rosea	Acis	Amaryllidaceae	Asparagales	AY101321	JX903158
Acis tingitana	Acis	Amaryllidaceae	Asparagales	AY101322	--
Acis valentina	Acis	Amaryllidaceae	Asparagales	AY101325	--
Acleisanthes longiflora	Acleisanthes	Nyctaginaceae	Caryophyllales	KY952302	FN868318
Acleisanthes somalensis	Acleisanthes	Nyctaginaceae	Caryophyllales	AY042655	AF214692
Acmadenia rupicola	Acmadenia	Rutaceae	Sapindales	--	AM235114
Acmanthera latifolia	Acmanthera	Malpighiaceae	Malpighiales	AF344524	AF344454
Acmella oppositifolia	Acmella	Asteraceae	Asterales	JN228937	--
Acmella radicans	Acmella	Asteraceae	Asterales	AY215758	AY215078
Acokanthera oblongifolia	Acokanthera	Apocynaceae	Gentianales	KX783624	X91758
Acokanthera oppositifolia	Acokanthera	Apocynaceae	Gentianales	JX517680	AM234828
Acokanthera rotundata	Acokanthera	Apocynaceae	Gentianales	JF270623	JF265266
Aconitum alboviolaceum	Aconitum	Ranunculaceae	Ranunculales	KF022380	KF022444
Aconitum anthora	Aconitum	Ranunculaceae	Ranunculales	FN668833	--
Aconitum artemisiifolium	Aconitum	Ranunculaceae	Ranunculales	--	DQ099435
Aconitum barbatum	Aconitum	Ranunculaceae	Ranunculales	KT964698	JF940657
Aconitum carmichaelii	Aconitum	Ranunculaceae	Ranunculales	LS398144	FJ449849
Aconitum degenii	Aconitum	Ranunculaceae	Ranunculales	FN668832	--
Aconitum henryi	Aconitum	Ranunculaceae	Ranunculales	KF022382	KF022447
Aconitum longecassidatum	Aconitum	Ranunculaceae	Ranunculales	NC_035894	JF940662
Aconitum lycoctonum	Aconitum	Ranunculaceae	Ranunculales	FN668830	--
Aconitum monticola	Aconitum	Ranunculaceae	Ranunculales	JF953036	JF940667
Aconitum napellus	Aconitum	Ranunculaceae	Ranunculales	JN895414	JN891272
Aconitum racemulosum	Aconitum	Ranunculaceae	Ranunculales	FJ626484	FJ449850
Aconitum rockii	Aconitum	Ranunculaceae	Ranunculales	KF022384	KF022449
Aconitum scaposum	Aconitum	Ranunculaceae	Ranunculales	KY658076	JF940671
Aconitum septentrionale	Aconitum	Ranunculaceae	Ranunculales	JF331795	JF331678
Aconitum sinomontanum	Aconitum	Ranunculaceae	Ranunculales	NC_036359	KF022450
Aconitum umbrosum	Aconitum	Ranunculaceae	Ranunculales	--	JF940680
Aconogonon cathayanum	Aconogonon	Polygonaceae	Caryophyllales	--	JN234958
Aconogonon divaricatum	Aconogonon	Polygonaceae	Caryophyllales	--	FM883603
Aconogonon hookeri	Aconogonon	Polygonaceae	Caryophyllales	KT280246	JN234960
Aconogonon molle	Aconogonon	Polygonaceae	Caryophyllales	GQ206190	EF653764
Aconogonon sibiricum	Aconogonon	Polygonaceae	Caryophyllales	KT280247	JN234982
Aconogonon tortuosum	Aconogonon	Polygonaceae	Caryophyllales	MF786792	JN234957
Acorus calamus	Acorus	Acoraceae	Acorales	LC461850	MF694941
Acorus gramineus	Acorus	Acoraceae	Acorales	EU814661	HQ901561
Acosmium cardenasii	Acosmium	Fabaceae	Fabales	KY118289	MG429822
Acosmium diffusissimum	Acosmium	Fabaceae	Fabales	JX124421	--
Acosmium lentiscifolium	Acosmium	Fabaceae	Fabales	KX816339	--
Acourtia turbinata	Acourtia	Asteraceae	Asterales	EU385317	EU384940
Acrachne racemosa	Acrachne	Poaceae	Poales	MF999000	MF998371
Acradenia euodiiformis	Acradenia	Rutaceae	Sapindales	KM894715	JN987069
Acradenia frankliniae	Acradenia	Rutaceae	Sapindales	--	JN987070
Acranthera frutescens	Acranthera	Rubiaceae	Gentianales	--	EU145449
Acranthera grandiflora	Acranthera	Rubiaceae	Gentianales	--	EU145448
Acranthera siamensis	Acranthera	Rubiaceae	Gentianales	--	EU145450
Acridocarpus adenophorus	Acridocarpus	Malpighiaceae	Malpighiales	HQ247173	HQ247415
Acridocarpus alternifolius	Acridocarpus	Malpighiaceae	Malpighiales	HQ247174	HQ247416
Acridocarpus chevalieri	Acridocarpus	Malpighiaceae	Malpighiales	HQ247175	HQ247417
Acridocarpus excelsus	Acridocarpus	Malpighiaceae	Malpighiales	HQ247176	HQ247418
Acridocarpus macrocalyx	Acridocarpus	Malpighiaceae	Malpighiales	HQ247177	HQ247419
Acridocarpus natalitius	Acridocarpus	Malpighiaceae	Malpighiales	AF344525	AF344455
Acridocarpus orientalis	Acridocarpus	Malpighiaceae	Malpighiales	HQ247178	HQ247420
Acridocarpus spectabilis	Acridocarpus	Malpighiaceae	Malpighiales	HQ247181	HQ247423
Acridocarpus staudtii	Acridocarpus	Malpighiaceae	Malpighiales	HQ247182	HQ247424
Acridocarpus zanzibaricus	Acridocarpus	Malpighiaceae	Malpighiales	HQ247183	HQ247425
Acritochaete volkensii	Acritochaete	Poaceae	Poales	HE586069	HE573336
Acrocarpus fraxinifolius	Acrocarpus	Fabaceae	Fabales	GU321971	AY904371
Acroceras tonkinense	Acroceras	Poaceae	Poales	HE574020	AM849376
Acrocomia aculeata	Acrocomia	Arecoideae	Arecales	NC_037084	NC_037084
Acrocomia crispa	Acrocomia	Arecoideae	Arecales	HQ265525	AY044629
Acrodon subulatus	Acrodon	Aizoaceae	Caryophyllales	KF132642	KF132536
Acrolophia bolusii	Acrolophia	Orchidaceae	Asparagales	KF358115	KF358055
Acrolophia capensis	Acrolophia	Orchidaceae	Asparagales	KF358074	KF358001
Acrolophia cochlearis	Acrolophia	Orchidaceae	Asparagales	KF358097	KF358029
Acrolophia lamellata	Acrolophia	Orchidaceae	Asparagales	KF358063	KF358002
Acrolophia micrantha	Acrolophia	Orchidaceae	Asparagales	KF358111	KF358019
Acrolophia ustulata	Acrolophia	Orchidaceae	Asparagales	KF358121	KF358027
Acronychia imperforata	Acronychia	Rutaceae	Sapindales	KM894907	JN987071
Acronychia laevis	Acronychia	Rutaceae	Sapindales	KM894770	JN987072
Acronychia pedunculata	Acronychia	Rutaceae	Sapindales	HQ415351	FN599440
Acronychia wilcoxiana	Acronychia	Rutaceae	Sapindales	KM894623	JN987075
Acrophyllum australe	Acrophyllum	Cunoniaceae	Oxalidales	--	AF291926
Acrorchis roseola	Acrorchis	Orchidaceae	Asparagales	AY396086	--
Acrosanthes teretifolia	Acrosanthes	Aizoaceae	Caryophyllales	KX197638	AM234785
Acrosynanthus latifolius	Acrosynanthus	Rubiaceae	Gentianales	--	GQ852301
Acrosynanthus minor	Acrosynanthus	Rubiaceae	Gentianales	--	GQ852302
Acrosynanthus revolutus	Acrosynanthus	Rubiaceae	Gentianales	--	GQ852303
Acrothamnus colensoi	Acrothamnus	Ericaceae	Ericales	--	L12610
Acrothamnus hookeri	Acrothamnus	Ericaceae	Ericales	AY372641	JQ667218
Acrothamnus maccraei	Acrothamnus	Ericaceae	Ericales	AY372644	JQ305849
Acrothamnus montanus	Acrothamnus	Ericaceae	Ericales	--	JQ667222
Acrothamnus spathaceus	Acrothamnus	Ericaceae	Ericales	AY372656	JQ667226
Acrothamnus suaveolens	Acrothamnus	Ericaceae	Ericales	AY372668	JQ667228
Acrotome hispida	Acrotome	Lamiaceae	Lamiales	HQ911530	--
Acrotome inflata	Acrotome	Lamiaceae	Lamiales	HQ911533	--
Acrotome pallescens	Acrotome	Lamiaceae	Lamiales	HQ911531	--
Acrotrema costatum	Acrotrema	Dilleniaceae	Dilleniales	--	FJ860340
Acrotriche affinis	Acrotriche	Ericaceae	Ericales	JQ667084	JQ667232
Acrotriche divaricata	Acrotriche	Ericaceae	Ericales	AY005094	U80432
Acrotriche lancifolia	Acrotriche	Ericaceae	Ericales	--	JQ667233
Acrotriche parviflora	Acrotriche	Ericaceae	Ericales	JQ305826	JQ305850
Acrotriche patula	Acrotriche	Ericaceae	Ericales	--	JQ667235
Acrotriche ramiflora	Acrotriche	Ericaceae	Ericales	--	JQ667236
Acrotriche rigida	Acrotriche	Ericaceae	Ericales	JQ667085	JQ667238
Acrotriche serrulata	Acrotriche	Ericaceae	Ericales	JQ667086	JQ667239
Acsmithia elliptica	Acsmithia	Cunoniaceae	Oxalidales	--	AF291935
Actaea arizonica	Actaea	Ranunculaceae	Ranunculales	JQ033491	JQ033643
Actaea asiatica	Actaea	Ranunculaceae	Ranunculales	NC_041525	FJ626575
Actaea cimicifuga	Actaea	Ranunculaceae	Ranunculales	MH116510	GQ436536
Actaea cordifolia	Actaea	Ranunculaceae	Ranunculales	JQ033403	JQ033696
Actaea elata	Actaea	Ranunculaceae	Ranunculales	JQ033510	JQ033650
Actaea japonica	Actaea	Ranunculaceae	Ranunculales	AF353578	KX527557
Actaea laciniata	Actaea	Ranunculaceae	Ranunculales	--	DQ099449
Actaea pachypoda	Actaea	Ranunculaceae	Ranunculales	MK509372	HQ589935
Actaea podocarpa	Actaea	Ranunculaceae	Ranunculales	JQ033496	JQ033672
Actaea racemosa	Actaea	Ranunculaceae	Ranunculales	MK089943	MK090237
Actaea rubra	Actaea	Ranunculaceae	Ranunculales	MK509373	HQ589936
Actaea simplex	Actaea	Ranunculaceae	Ranunculales	JQ033508	AY954483
Actaea spicata	Actaea	Ranunculaceae	Ranunculales	JQ033507	JQ033710
Actaea vaginata	Actaea	Ranunculaceae	Ranunculales	NC_041543	FJ626588
Actephila albidula	Actephila	Phyllanthaceae	Malpighiales	AM745911	--
Actephila collinsiae	Actephila	Phyllanthaceae	Malpighiales	AM745913	--
Actephila excelsa	Actephila	Phyllanthaceae	Malpighiales	KJ708791	KJ594562
Actephila latifolia	Actephila	Phyllanthaceae	Malpighiales	AM745923	--
Actephila lindleyi	Actephila	Phyllanthaceae	Malpighiales	AY830190	AY663560
Actephila ovalis	Actephila	Phyllanthaceae	Malpighiales	AM745930	--
Actephila sessilifolia	Actephila	Phyllanthaceae	Malpighiales	AM745932	KU564752
Actephila subsessilis	Actephila	Phyllanthaceae	Malpighiales	AM745934	--
Actinanthella menyharthii	Actinanthella	Loranthaceae	Santalales	EU544408	--
Actinidia arguta	Actinidia	Actinidiaceae	Ericales	MG714318	KC519881
Actinidia callosa	Actinidia	Actinidiaceae	Ericales	KU853329	KC519863
Actinidia chinensis	Actinidia	Actinidiaceae	Ericales	KP314175	KC519933
Actinidia chrysantha	Actinidia	Actinidiaceae	Ericales	KP314190	KC519865
Actinidia cylindrica	Actinidia	Actinidiaceae	Ericales	KP314205	KC519873
Actinidia deliciosa	Actinidia	Actinidiaceae	Ericales	KP314177	KC519935
Actinidia eriantha	Actinidia	Actinidiaceae	Ericales	MG714320	AJ549057
Actinidia farinosa	Actinidia	Actinidiaceae	Ericales	KC519984	AJ549064
Actinidia fortunatii	Actinidia	Actinidiaceae	Ericales	KP314184	KC519878
Actinidia fulvicoma	Actinidia	Actinidiaceae	Ericales	KP314195	KC519867
Actinidia glaucocallosa	Actinidia	Actinidiaceae	Ericales	KC519994	KC519918
Actinidia grandiflora	Actinidia	Actinidiaceae	Ericales	--	AJ549044
Actinidia hemsleyana	Actinidia	Actinidiaceae	Ericales	MG714314	KC519927
Actinidia henanensis	Actinidia	Actinidiaceae	Ericales	AF322597	AJ549060
Actinidia henryi	Actinidia	Actinidiaceae	Ericales	KP314206	KC519905
Actinidia hubeiensis	Actinidia	Actinidiaceae	Ericales	--	AJ549056
Actinidia indochinensis	Actinidia	Actinidiaceae	Ericales	AF322606	KC519902
Actinidia kolomikta	Actinidia	Actinidiaceae	Ericales	KY951993	AJ549070
Actinidia laevissima	Actinidia	Actinidiaceae	Ericales	KC519967	KC519890
Actinidia lanceolata	Actinidia	Actinidiaceae	Ericales	MG714317	AJ549072
Actinidia latifolia	Actinidia	Actinidiaceae	Ericales	KP314187	KC519872
Actinidia liangguangensis	Actinidia	Actinidiaceae	Ericales	KP314193	KC519889
Actinidia lijiangensis	Actinidia	Actinidiaceae	Ericales	--	AJ549045
Actinidia macrosperma	Actinidia	Actinidiaceae	Ericales	AF322621	AJ549042
Actinidia melanandra	Actinidia	Actinidiaceae	Ericales	MG714316	AJ549050
Actinidia melliana	Actinidia	Actinidiaceae	Ericales	KP314194	KC519888
Actinidia persicina	Actinidia	Actinidiaceae	Ericales	AF322611	AJ549068
Actinidia pilosula	Actinidia	Actinidiaceae	Ericales	KR819667	KC519922
Actinidia polygama	Actinidia	Actinidiaceae	Ericales	KP314208	KC519897
Actinidia rubricaulis	Actinidia	Actinidiaceae	Ericales	KP314204	KC519908
Actinidia rudis	Actinidia	Actinidiaceae	Ericales	KR819669	KC519917
Actinidia rufa	Actinidia	Actinidiaceae	Ericales	NC_039973	AJ549059
Actinidia sabiifolia	Actinidia	Actinidiaceae	Ericales	AF322607	AJ549039
Actinidia styracifolia	Actinidia	Actinidiaceae	Ericales	AF322612	AJ549033
Actinidia suberifolia	Actinidia	Actinidiaceae	Ericales	KC519989	KC519913
Actinidia valvata	Actinidia	Actinidiaceae	Ericales	MG714313	KC519894
Actinidia venosa	Actinidia	Actinidiaceae	Ericales	MF786981	KC519925
Actinidia zhejiangensis	Actinidia	Actinidiaceae	Ericales	AF322613	AJ549038
Actinobole uliginosum	Actinobole	Asteraceae	Asterales	AF151433	--
Actinodaphne borneensis	Actinodaphne	Lauraceae	Laurales	AJ247142	--
Actinodaphne diversifolia	Actinodaphne	Lauraceae	Laurales	AJ627910	--
Actinodaphne forrestii	Actinodaphne	Lauraceae	Laurales	KX545909	KX546789
Actinodaphne glomerata	Actinodaphne	Lauraceae	Laurales	AB258991	--
Actinodaphne macrophylla	Actinodaphne	Lauraceae	Laurales	AB258990	--
Actinodaphne malaccensis	Actinodaphne	Lauraceae	Laurales	KJ708793	KJ594563
Actinodaphne myriantha	Actinodaphne	Lauraceae	Laurales	AB259063	--
Actinodaphne obovata	Actinodaphne	Lauraceae	Laurales	KX545911	KX546792
Actinodaphne omeiensis	Actinodaphne	Lauraceae	Laurales	HM019309	HM019449
Actinodaphne procera	Actinodaphne	Lauraceae	Laurales	AB259064	--
Actinodaphne pruinosa	Actinodaphne	Lauraceae	Laurales	EU153822	--
Actinodium cunninghamii	Actinodium	Myrtaceae	Myrtales	AF489394	AF489338
Actinokentia divaricata	Actinokentia	Arecoideae	Arecales	HG969959	HG969660
Actinokentia huerlimannii	Actinokentia	Arecoideae	Arecales	HG969960	HG969661
Actinorhytis calapparia	Actinorhytis	Arecoideae	Arecales	HG969979	HG969681
Actinoschoenus thouarsii	Actinoschoenus	Cyperaceae	Poales	--	AM999783
Actinoscirpus grossus	Actinoscirpus	Cyperaceae	Poales	KX036976	KX036966
Actinostemma tenerum	Actinostemma	Cucurbitaceae	Cucurbitales	DQ536631	DQ469135
Actinostemon amazonicus	Actinostemon	Euphorbiaceae	Malpighiales	--	AY794861
Actinostemon caribaeus	Actinostemon	Euphorbiaceae	Malpighiales	--	AY794863
Actinostemon concolor	Actinostemon	Euphorbiaceae	Malpighiales	AB233779	AB233883
Adansonia digitata	Adansonia	Malvaceae	Malvales	JQ024933	AY328180
Adansonia gregorii	Adansonia	Malvaceae	Malvales	HQ696688	--
Adelia cinerea	Adelia	Euphorbiaceae	Malpighiales	LK021369	DQ997801
Adelia obovata	Adelia	Euphorbiaceae	Malpighiales	--	DQ997802
Adelia ricinella	Adelia	Euphorbiaceae	Malpighiales	LK021370	AY794918
Adelia triloba	Adelia	Euphorbiaceae	Malpighiales	GQ981927	GQ981655
Adelia vaseyi	Adelia	Euphorbiaceae	Malpighiales	--	DQ997804
Adelobotrys adscendens	Adelobotrys	Melastomataceae	Myrtales	--	JQ592646
Adelobotrys boissieriana	Adelobotrys	Melastomataceae	Myrtales	--	AF215530
Adelobotrys macrantha	Adelobotrys	Melastomataceae	Myrtales	--	AF215531
Adenandra uniflora	Adenandra	Rutaceae	Sapindales	--	AF066803
Adenanthera microsperma	Adenanthera	Fabaceae	Fabales	NC_034986	GQ436377
Adenanthera pavonina	Adenanthera	Fabaceae	Fabales	AB924732	GU135287
Adenanthos sericeus	Adenanthos	Proteaceae	Proteales	EU169606	DQ875835
Adenaria floribunda	Adenaria	Lythraceae	Myrtales	GU228431	AY905403
Adenia digitata	Adenia	Passifloraceae	Malpighiales	AY491659	Z75687
Adenia fruticosa	Adenia	Passifloraceae	Malpighiales	JX905957	JX572241
Adenia gummifera	Adenia	Passifloraceae	Malpighiales	JX517347	JX572242
Adenia isaloensis	Adenia	Passifloraceae	Malpighiales	--	DQ123389
Adenia keramanthus	Adenia	Passifloraceae	Malpighiales	--	DQ123390
Adenia spinosa	Adenia	Passifloraceae	Malpighiales	JX905950	JF265269
Adenium multiflorum	Adenium	Apocynaceae	Gentianales	MF447885	JX572243
Adenium obesum	Adenium	Apocynaceae	Gentianales	MF491511	AJ002880
Adenium swazicum	Adenium	Apocynaceae	Gentianales	JX517457	JF265271
Adenocarpus complicatus	Adenocarpus	Fabaceae	Fabales	KY046183	Z70113
Adenocarpus foliolosus	Adenocarpus	Fabaceae	Fabales	--	Z70114
Adenocarpus telonensis	Adenocarpus	Fabaceae	Fabales	--	Z70115
Adenocarpus viscosus	Adenocarpus	Fabaceae	Fabales	--	Z70116
Adenocaulon bicolor	Adenocaulon	Asteraceae	Asterales	KX676904	EU384943
Adenocaulon chilense	Adenocaulon	Asteraceae	Asterales	MG553765	EU384942
Adenocaulon himalaicum	Adenocaulon	Asteraceae	Asterales	MG710482	JQ933206
Adenochilus nortonii	Adenochilus	Orchidaceae	Asparagales	AJ309995	AY381108
Adenochlaena leucocephala	Adenochlaena	Euphorbiaceae	Malpighiales	LK021371	AY794970
Adenocline acuta	Adenocline	Euphorbiaceae	Malpighiales	AB233770	AB233874
Adenocline violifolia	Adenocline	Euphorbiaceae	Malpighiales	--	AY794870
Adenodolichos rupestris	Adenodolichos	Fabaceae	Fabales	--	AF308700
Adenogramma glomerata	Adenogramma	Molluginaceae	Caryophyllales	FN825689	FN824407
Adenogramma lichtensteiniana	Adenogramma	Molluginaceae	Caryophyllales	--	AM235030
Adenogramma mollugo	Adenogramma	Molluginaceae	Caryophyllales	FN825690	FN824409
Adenogramma teretifolia	Adenogramma	Molluginaceae	Caryophyllales	FN825691	FN824410
Adenolinum lewisii	Adenolinum	Linaceae	Malpighiales	AB233791	AB233895
Adenolobus garipensis	Adenolobus	Fabaceae	Fabales	NC_036761	AM234268
Adenolobus pechuelii	Adenolobus	Fabaceae	Fabales	KT347058	AM234264
Adenoncos parviflora	Adenoncos	Orchidaceae	Asparagales	KY966704	--
Adenopeltis serrata	Adenopeltis	Euphorbiaceae	Malpighiales	AB268058	AY794844
Adenophaedra grandifolia	Adenophaedra	Euphorbiaceae	Malpighiales	--	AY794930
Adenophora capillaris	Adenophora	Campanulaceae	Asterales	KT970184	KF175333
Adenophora coelestis	Adenophora	Campanulaceae	Asterales	KF175302	KF175360
Adenophora divaricata	Adenophora	Campanulaceae	Asterales	NC_036221	EU713430
Adenophora erecta	Adenophora	Campanulaceae	Asterales	NC_036222	KC146545
Adenophora grandiflora	Adenophora	Campanulaceae	Asterales	KC146469	KC146509
Adenophora himalayana	Adenophora	Campanulaceae	Asterales	KT970185	KF175335
Adenophora kayasanensis	Adenophora	Campanulaceae	Asterales	KC146470	KC146510
Adenophora khasiana	Adenophora	Campanulaceae	Asterales	KF175291	KF175349
Adenophora lamarckii	Adenophora	Campanulaceae	Asterales	LT706725	KC146542
Adenophora liliifolia	Adenophora	Campanulaceae	Asterales	MF158714	KC146540
Adenophora liliifolioides	Adenophora	Campanulaceae	Asterales	MF349852	KF175344
Adenophora polyantha	Adenophora	Campanulaceae	Asterales	KF175299	KC146511
Adenophora racemosa	Adenophora	Campanulaceae	Asterales	KC146494	KC146512
Adenophora remotiflora	Adenophora	Campanulaceae	Asterales	NC_026999	EU643715
Adenophora stenanthina	Adenophora	Campanulaceae	Asterales	KF175288	KF175347
Adenophora stricta	Adenophora	Campanulaceae	Asterales	NC_036223	AY655145
Adenophora taquetii	Adenophora	Campanulaceae	Asterales	KC146504	KC146544
Adenophora trachelioides	Adenophora	Campanulaceae	Asterales	KF175293	KF175353
Adenophora triphylla	Adenophora	Campanulaceae	Asterales	NC_040857	KF175354
Adenopodia spicata	Adenopodia	Fabaceae	Fabales	JX517808	JX572245
Adenosma indianum	Adenosma	Plantaginaceae	Lamiales	--	JQ933207
Adenostemma lavenia	Adenostemma	Asteraceae	Asterales	--	JQ933208
Adenostoma fasciculatum	Adenostoma	Rosaceae	Rosales	KY387915	KY387915
Adenostoma sparsifolium	Adenostoma	Rosaceae	Rosales	--	U06790
Adesmia bicolor	Adesmia	Fabaceae	Fabales	JN835375	--
Adesmia candida	Adesmia	Fabaceae	Fabales	JN835374	--
Adesmia corymbosa	Adesmia	Fabaceae	Fabales	JN835373	--
Adesmia exilis	Adesmia	Fabaceae	Fabales	--	U74254
Adesmia fuentesii	Adesmia	Fabaceae	Fabales	JN835377	--
Adesmia grandiflora	Adesmia	Fabaceae	Fabales	JN835372	--
Adesmia latifolia	Adesmia	Fabaceae	Fabales	KX906598	--
Adesmia longiseta	Adesmia	Fabaceae	Fabales	JN835371	--
Adesmia salicornioides	Adesmia	Fabaceae	Fabales	JN835370	--
Adina pilulifera	Adina	Rubiaceae	Gentianales	GQ434176	AJ346964
Adina pubicostata	Adina	Rubiaceae	Gentianales	--	KC737729
Adina rubella	Adina	Rubiaceae	Gentianales	--	AJ346965
Adinandra dumosa	Adinandra	Pentaphylacaceae	Ericales	MG784951	Z83149
Adinandra formosana	Adinandra	Pentaphylacaceae	Ericales	KJ687898	AF089713
Adinandra millettii	Adinandra	Pentaphylacaceae	Ericales	AF380069	HQ427223
Adinauclea fagifolia	Adinauclea	Rubiaceae	Gentianales	--	AJ346966
Adolphia infesta	Adolphia	Rhamnaceae	Rosales	--	AJ390055
Adonidia maturbongsii	Adonidia	Arecoideae	Arecales	KJ598374	--
Adonidia merrillii	Adonidia	Arecoideae	Arecales	KJ598371	AJ829848
Adonis aestivalis	Adonis	Ranunculaceae	Ranunculales	--	KF724232
Adonis amurensis	Adonis	Ranunculaceae	Ranunculales	MF349963	EU053900
Adonis annua	Adonis	Ranunculaceae	Ranunculales	JN895412	JN892666
Adonis vernalis	Adonis	Ranunculaceae	Ranunculales	KJ746121	KJ746304
Adoxa moschatellina	Adoxa	Adoxaceae	Dipsacales	MK509375	L01883
Adriana quadripartita	Adriana	Euphorbiaceae	Malpighiales	AB233751	AB233855
Adromischus caryophyllaceus	Adromischus	Crassulaceae	Saxifragales	AF115576	--
Adromischus maculatus	Adromischus	Crassulaceae	Saxifragales	AF115575	--
Adrorhizon purpurascens	Adrorhizon	Orchidaceae	Asparagales	GQ145084	FN870754
Aechmea alba	Aechmea	Bromeliaceae	Poales	KJ580012	JX649329
Aechmea allenii	Aechmea	Bromeliaceae	Poales	AY950001	JF280743
Aechmea aquilega	Aechmea	Bromeliaceae	Poales	JN202203	JN202111
Aechmea bambusoides	Aechmea	Bromeliaceae	Poales	KJ580014	JX649330
Aechmea bicolor	Aechmea	Bromeliaceae	Poales	KU762875	JN202113
Aechmea blumenavii	Aechmea	Bromeliaceae	Poales	KU762856	JN202115
Aechmea bromeliifolia	Aechmea	Bromeliaceae	Poales	KU258019	JF280678
Aechmea bruggeri	Aechmea	Bromeliaceae	Poales	KJ579986	--
Aechmea calyculata	Aechmea	Bromeliaceae	Poales	EU780842	JN202119
Aechmea carvalhoi	Aechmea	Bromeliaceae	Poales	EF110641	--
Aechmea caudata	Aechmea	Bromeliaceae	Poales	JN202214	JN202122
Aechmea chantinii	Aechmea	Bromeliaceae	Poales	AY950042	L19978
Aechmea coelestis	Aechmea	Bromeliaceae	Poales	KU702734	JN202124
Aechmea colombiana	Aechmea	Bromeliaceae	Poales	JX649276	JX649332
Aechmea costantinii	Aechmea	Bromeliaceae	Poales	KJ580111	--
Aechmea curranii	Aechmea	Bromeliaceae	Poales	KU762757	JN202127
Aechmea disjuncta	Aechmea	Bromeliaceae	Poales	KJ580079	--
Aechmea distichantha	Aechmea	Bromeliaceae	Poales	KU258023	EU219714
Aechmea drakeana	Aechmea	Bromeliaceae	Poales	AY950043	JF280679
Aechmea farinosa	Aechmea	Bromeliaceae	Poales	AY950031	EU219704
Aechmea fasciata	Aechmea	Bromeliaceae	Poales	AY950034	EU219707
Aechmea filicaulis	Aechmea	Bromeliaceae	Poales	KU702735	EU219709
Aechmea floribunda	Aechmea	Bromeliaceae	Poales	KJ579990	--
Aechmea fraseri	Aechmea	Bromeliaceae	Poales	KU762823	--
Aechmea fulgens	Aechmea	Bromeliaceae	Poales	KU258024	EU219706
Aechmea gamosepala	Aechmea	Bromeliaceae	Poales	EU681835	EF639793
Aechmea gracilis	Aechmea	Bromeliaceae	Poales	AY950038	EU219711
Aechmea guainumbiorum	Aechmea	Bromeliaceae	Poales	JX649235	JX649333
Aechmea involucrata	Aechmea	Bromeliaceae	Poales	KU762824	--
Aechmea kertesziae	Aechmea	Bromeliaceae	Poales	AY950039	EU219712
Aechmea lamarchei	Aechmea	Bromeliaceae	Poales	AY950044	JN202128
Aechmea leptantha	Aechmea	Bromeliaceae	Poales	AY950052	KC123380
Aechmea lingulata	Aechmea	Bromeliaceae	Poales	EF110643	JF280681
Aechmea lueddemanniana	Aechmea	Bromeliaceae	Poales	KU258027	KU095903
Aechmea magdalenae	Aechmea	Bromeliaceae	Poales	MG975065	JQ590946
Aechmea mcvaughii	Aechmea	Bromeliaceae	Poales	KU762804	JX649380
Aechmea mertensii	Aechmea	Bromeliaceae	Poales	AY950035	EU219708
Aechmea mexicana	Aechmea	Bromeliaceae	Poales	KU702737	EU219701
Aechmea miniata	Aechmea	Bromeliaceae	Poales	EF110638	--
Aechmea multiflora	Aechmea	Bromeliaceae	Poales	MG975067	--
Aechmea mutica	Aechmea	Bromeliaceae	Poales	KJ579998	--
Aechmea organensis	Aechmea	Bromeliaceae	Poales	JF295090	JF280682
Aechmea orlandiana	Aechmea	Bromeliaceae	Poales	EU681836	EF639794
Aechmea ornata	Aechmea	Bromeliaceae	Poales	MG975071	--
Aechmea pectinata	Aechmea	Bromeliaceae	Poales	KJ580005	--
Aechmea pedicellata	Aechmea	Bromeliaceae	Poales	EF110629	--
Aechmea racinae	Aechmea	Bromeliaceae	Poales	KU702738	JF280683
Aechmea recurvata	Aechmea	Bromeliaceae	Poales	KU258033	JN202140
Aechmea romeroi	Aechmea	Bromeliaceae	Poales	JX649239	JX649339
Aechmea turbinocalyx	Aechmea	Bromeliaceae	Poales	EF110622	JX649340
Aechmea vallerandii	Aechmea	Bromeliaceae	Poales	KJ580015	JX649341
Aechmea vanhoutteana	Aechmea	Bromeliaceae	Poales	KJ580004	--
Aechmea warasii	Aechmea	Bromeliaceae	Poales	AY950032	EU219705
Aechmea werdermannii	Aechmea	Bromeliaceae	Poales	KJ580023	--
Aegialitis annulata	Aegialitis	Plumbaginaceae	Caryophyllales	KY952312	AJ402918
Aegiceras corniculatum	Aegiceras	Primulaceae	Ericales	KX231341	U96653
Aegilops bicornis	Aegilops	Poaceae	Poales	KY636002	KY636002
Aegilops columnaris	Aegilops	Poaceae	Poales	KY636008	KY636008
Aegilops comosa	Aegilops	Poaceae	Poales	KY636011	KY636011
Aegilops crassa	Aegilops	Poaceae	Poales	KY636015	KY636015
Aegilops cylindrica	Aegilops	Poaceae	Poales	KY636017	MG227510
Aegilops geniculata	Aegilops	Poaceae	Poales	KY636020	KY636020
Aegilops juvenalis	Aegilops	Poaceae	Poales	KY636022	KY636022
Aegilops kotschyi	Aegilops	Poaceae	Poales	KY636023	KY636023
Aegilops longissima	Aegilops	Poaceae	Poales	KY636027	KY636027
Aegilops neglecta	Aegilops	Poaceae	Poales	KY636037	KY636037
Aegilops peregrina	Aegilops	Poaceae	Poales	KY636038	KY636038
Aegilops searsii	Aegilops	Poaceae	Poales	KY636042	KY636042
Aegilops sharonensis	Aegilops	Poaceae	Poales	KY636043	KY636043
Aegilops speltoides	Aegilops	Poaceae	Poales	KP210654	KP211001
Aegilops tauschii	Aegilops	Poaceae	Poales	KP210652	KP211000
Aegilops triuncialis	Aegilops	Poaceae	Poales	KY636055	KY636055
Aegilops umbellulata	Aegilops	Poaceae	Poales	KY636058	KY636058
Aegilops vavilovii	Aegilops	Poaceae	Poales	--	LN626635
Aegilops ventricosa	Aegilops	Poaceae	Poales	KY636064	KY636064
Aegiphila costaricensis	Aegiphila	Lamiaceae	Lamiales	--	JQ594358
Aegiphila panamensis	Aegiphila	Lamiaceae	Lamiales	GQ981928	GQ981656
Aegle marmelos	Aegle	Rutaceae	Sapindales	LC461802	JX856627
Aeglopsis chevalieri	Aeglopsis	Rutaceae	Sapindales	EF138837	FJ434193
Aegopodium podagraria	Aegopodium	Apiaceae	Apiales	KX677748	U50220
Aeluropus littoralis	Aeluropus	Poaceae	Poales	AF144597	EF125095
Aenigmatanthera doniana	Aenigmatanthera	Malpighiaceae	Malpighiales	--	HQ247426
Aenigmatanthera lasiandra	Aenigmatanthera	Malpighiaceae	Malpighiales	HQ247185	HQ247427
Aeonium aureum	Aeonium	Crassulaceae	Saxifragales	AF115614	KJ595671
Aeonium balsamiferum	Aeonium	Crassulaceae	Saxifragales	AY082161	LT746094
Aeonium canariense	Aeonium	Crassulaceae	Saxifragales	AY082268	--
Aeonium ciliatum	Aeonium	Crassulaceae	Saxifragales	AY082163	--
Aeonium davidbramwellii	Aeonium	Crassulaceae	Saxifragales	AY082164	--
Aeonium decorum	Aeonium	Crassulaceae	Saxifragales	AY082165	MH195250
Aeonium glandulosum	Aeonium	Crassulaceae	Saxifragales	AY082166	--
Aeonium glutinosum	Aeonium	Crassulaceae	Saxifragales	AY082167	--
Aeonium goochiae	Aeonium	Crassulaceae	Saxifragales	AF115579	--
Aeonium gorgoneum	Aeonium	Crassulaceae	Saxifragales	AY082169	--
Aeonium korneliuslemsii	Aeonium	Crassulaceae	Saxifragales	AY082171	--
Aeonium leucoblepharum	Aeonium	Crassulaceae	Saxifragales	AY082270	--
Aeonium mascaense	Aeonium	Crassulaceae	Saxifragales	AY082172	--
Aeonium nobile	Aeonium	Crassulaceae	Saxifragales	AF115582	--
Aeonium percarneum	Aeonium	Crassulaceae	Saxifragales	AY082174	--
Aeonium saundersii	Aeonium	Crassulaceae	Saxifragales	AY082175	--
Aeonium sedifolium	Aeonium	Crassulaceae	Saxifragales	AF115583	--
Aeonium simsii	Aeonium	Crassulaceae	Saxifragales	AF115585	--
Aeonium spathulatum	Aeonium	Crassulaceae	Saxifragales	AF115584	--
Aeonium tabuliforme	Aeonium	Crassulaceae	Saxifragales	AF115577	--
Aeonium undulatum	Aeonium	Crassulaceae	Saxifragales	AF115580	--
Aeonium urbicum	Aeonium	Crassulaceae	Saxifragales	AY082176	--
Aeonium volkeri	Aeonium	Crassulaceae	Saxifragales	AY082162	--
Aerangis articulata	Aerangis	Orchidaceae	Asparagales	AY368389	AF074103
Aerangis biloba	Aerangis	Orchidaceae	Asparagales	KF557946	--
Aerangis confusa	Aerangis	Orchidaceae	Asparagales	KU748100	KU748080
Aerangis coriacea	Aerangis	Orchidaceae	Asparagales	DQ091345	--
Aerangis ellisii	Aerangis	Orchidaceae	Asparagales	KF557992	--
Aerangis fastuosa	Aerangis	Orchidaceae	Asparagales	DQ091340	--
Aerangis kirkii	Aerangis	Orchidaceae	Asparagales	DQ091333	--
Aerangis kotschyana	Aerangis	Orchidaceae	Asparagales	KU748312	KU748329
Aerangis luteoalba	Aerangis	Orchidaceae	Asparagales	DQ091347	--
Aerangis macrocentra	Aerangis	Orchidaceae	Asparagales	KF557923	--
Aerangis modesta	Aerangis	Orchidaceae	Asparagales	DQ091341	--
Aerangis punctata	Aerangis	Orchidaceae	Asparagales	KF557936	--
Aerangis somalensis	Aerangis	Orchidaceae	Asparagales	DQ091346	KU748380
Aerangis thomsonii	Aerangis	Orchidaceae	Asparagales	DQ091336	KU748382
Aerangis ugandensis	Aerangis	Orchidaceae	Asparagales	DQ091334	KU748383
Aerangis verdickii	Aerangis	Orchidaceae	Asparagales	DQ091348	--
Aeranthes arachnites	Aeranthes	Orchidaceae	Asparagales	KF557945	--
Aeranthes caudata	Aeranthes	Orchidaceae	Asparagales	KF557929	--
Aeranthes grandiflora	Aeranthes	Orchidaceae	Asparagales	EU490716	--
Aeranthes moratii	Aeranthes	Orchidaceae	Asparagales	KF558024	--
Aeranthes neoperrieri	Aeranthes	Orchidaceae	Asparagales	KF557953	--
Aeranthes peyrotii	Aeranthes	Orchidaceae	Asparagales	KF557980	--
Aeranthes ramosa	Aeranthes	Orchidaceae	Asparagales	AY368390	AF074104
Aeranthes strangulata	Aeranthes	Orchidaceae	Asparagales	KF558005	--
Aeranthes tenella	Aeranthes	Orchidaceae	Asparagales	KF557997	--
Aeranthes virginalis	Aeranthes	Orchidaceae	Asparagales	KF557955	--
Aerides crassifolia	Aerides	Orchidaceae	Asparagales	KJ028766	JX068004
Aerides crispa	Aerides	Orchidaceae	Asparagales	EF655793	--
Aerides emericii	Aerides	Orchidaceae	Asparagales	EF655792	--
Aerides falcata	Aerides	Orchidaceae	Asparagales	MG490270	JX068007
Aerides houlletiana	Aerides	Orchidaceae	Asparagales	KY966705	JX068010
Aerides huttonii	Aerides	Orchidaceae	Asparagales	EF655816	--
Aerides inflexa	Aerides	Orchidaceae	Asparagales	EF655775	--
Aerides krabiensis	Aerides	Orchidaceae	Asparagales	KJ028774	JX068011
Aerides lawrenceae	Aerides	Orchidaceae	Asparagales	KJ028776	--
Aerides leeana	Aerides	Orchidaceae	Asparagales	EF655801	--
Aerides maculosa	Aerides	Orchidaceae	Asparagales	JN004347	JN005364
Aerides multiflora	Aerides	Orchidaceae	Asparagales	JN004351	JN005368
Aerides odorata	Aerides	Orchidaceae	Asparagales	MG905910	JX068006
Aerides quinquevulnera	Aerides	Orchidaceae	Asparagales	KJ028778	--
Aerides ringens	Aerides	Orchidaceae	Asparagales	EF655791	--
Aerides rosea	Aerides	Orchidaceae	Asparagales	KY966706	JX068009
Aerides sukauensis	Aerides	Orchidaceae	Asparagales	EF655810	--
Aerides thibautiana	Aerides	Orchidaceae	Asparagales	EF655813	--
Aerva javanica	Aerva	Amaranthaceae	Caryophyllales	MK290575	FR775284
Aerva lanata	Aerva	Amaranthaceae	Caryophyllales	LT992608	FR775285
Aerva leucura	Aerva	Amaranthaceae	Caryophyllales	DQ317308	AJ833690
Aerva sanguinolenta	Aerva	Amaranthaceae	Caryophyllales	KX783625	KX783814
Aeschynomene americana	Aeschynomene	Fabaceae	Fabales	MH070595	JQ591549
Aeschynomene compacta	Aeschynomene	Fabaceae	Fabales	--	JQ591550
Aeschynomene indica	Aeschynomene	Fabaceae	Fabales	MH325202	AF308701
Aesculus californica	Aesculus	Hippocastanaceae	Sapindales	EU687719	--
Aesculus chinensis	Aesculus	Hippocastanaceae	Sapindales	EU687709	GQ436546
Aesculus flava	Aesculus	Hippocastanaceae	Sapindales	EU687739	DQ978441
Aesculus glabra	Aesculus	Hippocastanaceae	Sapindales	EU687735	KF724285
Aesculus hippocastanum	Aesculus	Hippocastanaceae	Sapindales	KX677636	HG765033
Aesculus indica	Aesculus	Hippocastanaceae	Sapindales	EU687712	HG765036
Aesculus parviflora	Aesculus	Hippocastanaceae	Sapindales	MF350240	DQ978448
Aesculus pavia	Aesculus	Hippocastanaceae	Sapindales	MF350204	U39277
Aesculus polyneura	Aesculus	Hippocastanaceae	Sapindales	EU687707	--
Aesculus sylvatica	Aesculus	Hippocastanaceae	Sapindales	EU687729	--
Aesculus tsiangii	Aesculus	Hippocastanaceae	Sapindales	EU687710	--
Aesculus turbinata	Aesculus	Hippocastanaceae	Sapindales	EU687724	KP088464
Aetanthus nodosus	Aetanthus	Loranthaceae	Santalales	EU544409	--
Aetheorhiza bulbosa	Aetheorhiza	Asteraceae	Asterales	DQ840430	--
Aetheorhyncha andreettae	Aetheorhyncha	Orchidaceae	Asparagales	AY869932	--
Aethionema grandiflorum	Aethionema	Brassicaceae	Brassicales	AF144354	AY167983
Aethionema saxatile	Aethionema	Brassicaceae	Brassicales	EU371817	AY483262
Aethusa cynapium	Aethusa	Apiaceae	Apiales	MK509376	JN891276
Aextoxicon punctatum	Aextoxicon	Aextoxicaceae	Berberidopsidales	DQ182342	X83986
Afgekia filipes	Afgekia	Fabaceae	Fabales	--	GQ436345
Afgekia sericea	Afgekia	Fabaceae	Fabales	KF294875	AB045785
Afraegle paniculata	Afraegle	Rutaceae	Sapindales	EF138838	AB505962
Afrobrunnichia erecta	Afrobrunnichia	Polygonaceae	Caryophyllales	MH286316	FJ154448
Afrocalathea rhizantha	Afrocalathea	Marantaceae	Zingiberales	AY140262	--
Afrocanthium lactescens	Afrocanthium	Rubiaceae	Gentianales	HM119502	HM164152
Afrocanthium mundianum	Afrocanthium	Rubiaceae	Gentianales	JX517319	JX572367
Afrocanthium racemulosum	Afrocanthium	Rubiaceae	Gentianales	JX517417	JX572246
Afrolicania elaeosperma	Afrolicania	Chrysobalanaceae	Malpighiales	NC_030544	JQ898729
Afrolimon peregrinum	Afrolimon	Plumbaginaceae	Caryophyllales	MF190444	JQ412383
Afrostyrax kamerunensis	Afrostyrax	Huaceae	Oxalidales	AY935895	AY935720
Afrostyrax lepidophyllus	Afrostyrax	Huaceae	Oxalidales	AY935896	AY935721
Afrotrewia kamerunica	Afrotrewia	Euphorbiaceae	Malpighiales	--	DQ991513
Afzelia africana	Afzelia	Fabaceae	Fabales	KX161926	KJ735963
Afzelia bella	Afzelia	Fabaceae	Fabales	KX161928	KC627950
Afzelia bipindensis	Afzelia	Fabaceae	Fabales	KX161929	MF437035
Afzelia pachyloba	Afzelia	Fabaceae	Fabales	--	MF437034
Afzelia quanzensis	Afzelia	Fabaceae	Fabales	KX161930	JX572247
Agalinis acuta	Agalinis	Orobanchaceae	Lamiales	AY563908	AY563943
Agalinis aphylla	Agalinis	Orobanchaceae	Lamiales	AY563911	AY563939
Agalinis auriculata	Agalinis	Orobanchaceae	Lamiales	AY563917	AY563938
Agalinis calycina	Agalinis	Orobanchaceae	Lamiales	GU943670	EU828219
Agalinis divaricata	Agalinis	Orobanchaceae	Lamiales	AY563906	AY563946
Agalinis edwardsiana	Agalinis	Orobanchaceae	Lamiales	EU828212	EU828221
Agalinis fasciculata	Agalinis	Orobanchaceae	Lamiales	MH552278	AY563944
Agalinis filicaulis	Agalinis	Orobanchaceae	Lamiales	AY563907	AY563937
Agalinis gattingeri	Agalinis	Orobanchaceae	Lamiales	MK509378	EU828224
Agalinis harperi	Agalinis	Orobanchaceae	Lamiales	GU943686	EU828226
Agalinis heterophylla	Agalinis	Orobanchaceae	Lamiales	AY563918	GU943604
Agalinis homalantha	Agalinis	Orobanchaceae	Lamiales	GU943691	EU828228
Agalinis laxa	Agalinis	Orobanchaceae	Lamiales	EU828214	EU828230
Agalinis linifolia	Agalinis	Orobanchaceae	Lamiales	AY563923	GU943610
Agalinis maritima	Agalinis	Orobanchaceae	Lamiales	GU943697	GU943612
Agalinis navasotensis	Agalinis	Orobanchaceae	Lamiales	GU943699	EU828232
Agalinis obtusifolia	Agalinis	Orobanchaceae	Lamiales	AY563910	GU943615
Agalinis oligophylla	Agalinis	Orobanchaceae	Lamiales	EU828216	EU828235
Agalinis paupercula	Agalinis	Orobanchaceae	Lamiales	GU943713	GU943627
Agalinis plukenetii	Agalinis	Orobanchaceae	Lamiales	MH552369	EU828236
Agalinis pulchella	Agalinis	Orobanchaceae	Lamiales	AY563912	EU828237
Agalinis purpurea	Agalinis	Orobanchaceae	Lamiales	MK509379	EU828238
Agalinis setacea	Agalinis	Orobanchaceae	Lamiales	MH552266	AY563941
Agalinis skinneriana	Agalinis	Orobanchaceae	Lamiales	MK509380	EU828240
Agalinis strictifolia	Agalinis	Orobanchaceae	Lamiales	AY563913	AY563945
Agalinis tenuifolia	Agalinis	Orobanchaceae	Lamiales	MK509381	AY563936
Agalinis viridis	Agalinis	Orobanchaceae	Lamiales	EU828218	EU828242
Aganisia cyanea	Aganisia	Orchidaceae	Asparagales	AY870005	--
Aganisia fimbriata	Aganisia	Orchidaceae	Asparagales	AY870006	--
Aganisia pulchella	Aganisia	Orchidaceae	Asparagales	AY870007	--
Aganope gabonica	Aganope	Fabaceae	Fabales	JX506605	--
Aganope leucobotrya*	Aganope	Fabaceae	Fabales	MN370284	MN366675
Aganosma cymosa	Aganosma	Apocynaceae	Gentianales	KJ953903	KJ953903
Aganosma schlechteriana	Aganosma	Apocynaceae	Gentianales	EF456259	--
Aganosma wallichii	Aganosma	Apocynaceae	Gentianales	EF456260	--
Agapanthus africanus	Agapanthus	Amaryllidaceae	Asparagales	JQ024934	JQ025019
Agapanthus campanulatus	Agapanthus	Amaryllidaceae	Asparagales	MH749019	MH749183
Agapetes buxifolia	Agapetes	Ericaceae	Ericales	LC168850	AF419811
Agapetes hosseana	Agapetes	Ericaceae	Ericales	LC168852	--
Agapetes serpens	Agapetes	Ericaceae	Ericales	LC168867	--
Agarista populifolia	Agarista	Ericaceae	Ericales	MF350109	AF124589
Agarista salicifolia	Agarista	Ericaceae	Ericales	U61313	AF124588
Agastache foeniculum	Agastache	Lamiaceae	Lamiales	AY840146	Z37381
Agastache mexicana	Agastache	Lamiaceae	Lamiales	--	Z37382
Agastache rugosa	Agastache	Lamiaceae	Lamiales	--	HM590067
Agastachys odorata	Agastachys	Proteaceae	Proteales	EU169607	DQ875824
Agatea longipedicellata	Agatea	Violaceae	Malpighiales	--	KC699560
Agatea schlechteri	Agatea	Violaceae	Malpighiales	AB354473	AB354401
Agatea veillonii	Agatea	Violaceae	Malpighiales	AB354474	AB354402
Agathosma ovata	Agathosma	Rutaceae	Sapindales	KP109980	AM235115
Agave americana	Agave	Asparagaceae	Asparagales	NC_032053	KX783816
Agave angustiarum	Agave	Asparagaceae	Asparagales	AM884156	--
Agave antillarum	Agave	Asparagaceae	Asparagales	AM884168	--
Agave attenuata	Agave	Asparagaceae	Asparagales	NC_032696	NC_032696
Agave bracteosa	Agave	Asparagaceae	Asparagales	JQ435518	AY299702
Agave capensis	Agave	Asparagaceae	Asparagales	AM884155	--
Agave datylio	Agave	Asparagaceae	Asparagales	AM884162	--
Agave gentryi	Agave	Asparagaceae	Asparagales	AM884171	--
Agave ghiesbreghtii	Agave	Asparagaceae	Asparagales	HM640592	AF206729
Agave guiengola	Agave	Asparagaceae	Asparagales	AM884169	--
Agave kerchovei	Agave	Asparagaceae	Asparagales	AM884161	--
Agave lecheguilla	Agave	Asparagaceae	Asparagales	AM884170	--
Agave nizandensis	Agave	Asparagaceae	Asparagales	AM884172	--
Agave parviflora	Agave	Asparagaceae	Asparagales	AM884173	--
Agave petrophila	Agave	Asparagaceae	Asparagales	AM884158	--
Agave potatorum	Agave	Asparagaceae	Asparagales	AM884174	--
Agave rhodacantha	Agave	Asparagaceae	Asparagales	AM884163	--
Agave salmiana	Agave	Asparagaceae	Asparagales	AM884164	JX125092
Agave schottii	Agave	Asparagaceae	Asparagales	--	JN796928
Agave seemanniana	Agave	Asparagaceae	Asparagales	JQ586435	--
Agave sisalana	Agave	Asparagaceae	Asparagales	GU135070	GU135234
Agave striata	Agave	Asparagaceae	Asparagales	AM884159	--
Agave stricta	Agave	Asparagaceae	Asparagales	AM884160	--
Agave titanota	Agave	Asparagaceae	Asparagales	AM884165	--
Agave triangularis	Agave	Asparagaceae	Asparagales	AM884166	--
Agdestis clematidea	Agdestis	Agdestidaceae	Caryophyllales	MH286339	AF132092
Agelanthus sansibarensis	Agelanthus	Loranthaceae	Santalales	EU544410	EU544464
Ageratina adenophora	Ageratina	Asteraceae	Asterales	MF716588	HM849743
Ageratina altissima	Ageratina	Asteraceae	Asterales	MK509384	HQ590095
Ageratum conyzoides	Ageratum	Asteraceae	Asterales	MG712612	JQ933210
Ageratum houstonianum	Ageratum	Asteraceae	Asterales	MH070591	MH049903
Agiortia cicatricata	Agiortia	Ericaceae	Ericales	AY372632	AY372572
Agiortia pedicellata	Agiortia	Ericaceae	Ericales	AY372649	JQ667363
Agiortia pleiosperma	Agiortia	Ericaceae	Ericales	JQ667155	JQ667368
Aglaia argentea	Aglaia	Meliaceae	Sapindales	MH115854	JF738621
Aglaia brassii	Aglaia	Meliaceae	Sapindales	--	JF738651
Aglaia cucullata	Aglaia	Meliaceae	Sapindales	--	JF738768
Aglaia elaeagnoidea	Aglaia	Meliaceae	Sapindales	KR530268	AY128209
Aglaia elliptica	Aglaia	Meliaceae	Sapindales	KJ708802	AY128210
Aglaia korthalsii	Aglaia	Meliaceae	Sapindales	GQ248073	GQ248542
Aglaia lawii	Aglaia	Meliaceae	Sapindales	MH115858	AB925640
Aglaia lepiorrhachis	Aglaia	Meliaceae	Sapindales	--	JF738731
Aglaia odorata	Aglaia	Meliaceae	Sapindales	KR530277	FN599442
Aglaia odoratissima	Aglaia	Meliaceae	Sapindales	MH115856	GQ248543
Aglaia rimosa	Aglaia	Meliaceae	Sapindales	--	JF738678
Aglaia sapindina	Aglaia	Meliaceae	Sapindales	--	JF738380
Aglaodorum griffithii	Aglaodorum	Araceae	Alismatales	AM920580	AM905758
Aglaonema crispum	Aglaonema	Araceae	Alismatales	MF350029	MF349528
Aglaonema modestum	Aglaonema	Araceae	Alismatales	AM920579	AM905757
Agonandra macrocarpa	Agonandra	Opiliaceae	Santalales	MH390634	DQ790130
Agonandra silvatica	Agonandra	Opiliaceae	Santalales	JQ626377	JQ625908
Agonis flexuosa	Agonis	Myrtaceae	Myrtales	KM065153	AF184673
Agoseris glauca	Agoseris	Asteraceae	Asterales	KX677199	JX848400
Agoseris retrorsa	Agoseris	Asteraceae	Asterales	AJ633250	--
Agrimonia eupatoria	Agrimonia	Rosaceae	Rosales	FJ395410	HM849744
Agrimonia gryposepala	Agrimonia	Rosaceae	Rosales	MK509385	HQ589939
Agrimonia nipponica	Agrimonia	Rosaceae	Rosales	AB073682	--
Agrimonia parviflora	Agrimonia	Rosaceae	Rosales	MK509386	U06791
Agrimonia pilosa	Agrimonia	Rosaceae	Rosales	MF158716	GQ436581
Agrimonia procera	Agrimonia	Rosaceae	Rosales	JN894964	JN892047
Agriophyllum squarrosum	Agriophyllum	Amaranthaceae	Caryophyllales	MG282030	AY270051
Agropyron cristatum	Agropyron	Poaceae	Poales	MF597109	MF596509
Agropyron desertorum	Agropyron	Poaceae	Poales	MK509388	HQ652721
Agropyron mongolicum	Agropyron	Poaceae	Poales	MH285848	KP210997
Agrostemma githago	Agrostemma	Caryophyllaceae	Caryophyllales	AY936315	JN891551
Agrostis alpina	Agrostis	Poaceae	Poales	KJ599301	KJ599187
Agrostis botelhoi	Agrostis	Poaceae	Poales	HM850552	HM849745
Agrostis canina	Agrostis	Poaceae	Poales	DQ146797	MG228163
Agrostis capillaris	Agrostis	Poaceae	Poales	KJ529327	MF596518
Agrostis castellana	Agrostis	Poaceae	Poales	DQ146799	--
Agrostis clavata	Agrostis	Poaceae	Poales	KF713156	MG228135
Agrostis congestiflora	Agrostis	Poaceae	Poales	HM850554	HM849746
Agrostis curtisii	Agrostis	Poaceae	Poales	KJ529329	JN891530
Agrostis gigantea	Agrostis	Poaceae	Poales	MF597128	NC_037162
Agrostis gracililaxa	Agrostis	Poaceae	Poales	HM850555	HM849747
Agrostis hyemalis	Agrostis	Poaceae	Poales	MH551968	KY627151
Agrostis magellanica	Agrostis	Poaceae	Poales	--	AY691630
Agrostis mertensii	Agrostis	Poaceae	Poales	MG216963	MG225913
Agrostis perennans	Agrostis	Poaceae	Poales	KJ772529	MG226757
Agrostis rupestris	Agrostis	Poaceae	Poales	--	KF602071
Agrostis scabra	Agrostis	Poaceae	Poales	KY607144	MF596534
Agrostis stolonifera	Agrostis	Poaceae	Poales	KJ529328	MF596543
Agrostis tenerrima	Agrostis	Poaceae	Poales	DQ786877	--
Agrostis vinealis	Agrostis	Poaceae	Poales	DQ146813	JN893785
Agrostistachys borneensis	Agrostistachys	Euphorbiaceae	Malpighiales	AB233752	AB233856
Agrostistachys indica	Agrostistachys	Euphorbiaceae	Malpighiales	AB924687	AB925297
Agrostophyllum glumaceum	Agrostophyllum	Orchidaceae	Asparagales	--	AY368351
Agrostophyllum majus	Agrostophyllum	Orchidaceae	Asparagales	AY368391	AF518054
Aichryson laxum	Aichryson	Crassulaceae	Saxifragales	AF115588	--
Aichryson pachycaulon	Aichryson	Crassulaceae	Saxifragales	AY082157	--
Aichryson palmense	Aichryson	Crassulaceae	Saxifragales	AY082156	--
Aichryson punctatum	Aichryson	Crassulaceae	Saxifragales	AF115587	--
Aichryson villosum	Aichryson	Crassulaceae	Saxifragales	HM850698	HM849749
Aidia cochinchinensis	Aidia	Rubiaceae	Gentianales	HQ427347	HQ427198
Aidia genipiflora*	Aidia	Rubiaceae	Gentianales	MN370099	MN366531
Aidia micrantha	Aidia	Rubiaceae	Gentianales	KJ815795	Z68844
Aidia racemosa	Aidia	Rubiaceae	Gentianales	KM894976	AJ286693
Ailanthus altissima	Ailanthus	Simaroubaceae	Sapindales	EU042841	FN599443
Ailanthus fordii	Ailanthus	Simaroubaceae	Sapindales	EU042842	EU042980
Ailanthus integrifolia	Ailanthus	Simaroubaceae	Sapindales	EU042843	EU042981
Ailanthus triphysa	Ailanthus	Simaroubaceae	Sapindales	EU042844	EU042982
Ainsliaea acerifolia	Ainsliaea	Asteraceae	Asterales	--	AY874432
Ainsliaea apiculata	Ainsliaea	Asteraceae	Asterales	EU385321	EU384944
Ainsliaea macrocephala	Ainsliaea	Asteraceae	Asterales	EU385322	EU384945
Aiouea dubia	Aiouea	Lauraceae	Laurales	EU153823	--
Aiouea longipetiolata	Aiouea	Lauraceae	Laurales	--	JQ625982
Aiouea saligna	Aiouea	Lauraceae	Laurales	KF981320	KF981229
Aiphanes erinacea	Aiphanes	Arecoideae	Arecales	HQ265527	--
Aiphanes grandis	Aiphanes	Arecoideae	Arecales	HQ265528	--
Aiphanes hirsuta	Aiphanes	Arecoideae	Arecales	HQ265529	--
Aiphanes horrida	Aiphanes	Arecoideae	Arecales	HQ265526	AY044626
Aiphanes minima	Aiphanes	Arecoideae	Arecales	HQ265531	KX530705
Aiphanes spicata	Aiphanes	Arecoideae	Arecales	HQ265532	--
Aiphanes ulei	Aiphanes	Arecoideae	Arecales	HQ265533	--
Aira caryophyllea	Aira	Poaceae	Poales	MF597146	MF998477
Aira cupaniana	Aira	Poaceae	Poales	KJ529350	--
Aira elegantissima	Aira	Poaceae	Poales	HE966874	HE963310
Aira praecox	Aira	Poaceae	Poales	MF597149	MF596550
Airopsis tenella	Airopsis	Poaceae	Poales	KJ529354	--
Airyantha schweinfurthii	Airyantha	Fabaceae	Fabales	JX295897	--
Ajania gracilis	Ajania	Asteraceae	Asterales	KJ372406	KJ372416
Ajuga chamaepitys	Ajuga	Lamiaceae	Lamiales	HQ902712	Z37384
Ajuga ciliata	Ajuga	Lamiaceae	Lamiales	HQ839699	HM590068
Ajuga decumbens	Ajuga	Lamiaceae	Lamiales	AF315299	JQ322527
Ajuga lupulina	Ajuga	Lamiaceae	Lamiales	MF801702	HM590058
Ajuga orientalis	Ajuga	Lamiaceae	Lamiales	HQ902729	HQ902758
Ajuga reptans	Ajuga	Lamiaceae	Lamiales	MK509389	U32163
Akebia quinata	Akebia	Lardizabalaceae	Ranunculales	NC_033913	GQ436540
Akebia trifoliata	Akebia	Lardizabalaceae	Ranunculales	KU853349	KF022454
Alafia barteri	Alafia	Apocynaceae	Gentianales	MG963238	MG963238
Alafia multiflora*	Alafia	Apocynaceae	Gentianales	MN370190	MN366515
Alafia thouarsii	Alafia	Apocynaceae	Gentianales	EF456355	--
Alamania punicea	Alamania	Orchidaceae	Asparagales	AY425801	--
Alangium chinense	Alangium	Cornaceae	Cornales	MG524996	MH092631
Alangium kurzii	Alangium	Cornaceae	Cornales	DQ341347	AF384108
Alangium longiflorum	Alangium	Cornaceae	Cornales	KJ708815	KJ594578
Alangium platanifolium	Alangium	Cornaceae	Cornales	U96880	JF308649
Alangium ridleyi	Alangium	Cornaceae	Cornales	MH332573	MH332439
Alangium salviifolium	Alangium	Cornaceae	Cornales	MG712585	JF308648
Alangium villosum	Alangium	Cornaceae	Cornales	KM894914	KM896099
Alantsilodendron alluaudianum	Alantsilodendron	Fabaceae	Fabales	AF521809	--
Alantsilodendron humbertii	Alantsilodendron	Fabaceae	Fabales	AF521810	--
Alantsilodendron pilosum	Alantsilodendron	Fabaceae	Fabales	KX302293	--
Alberta magna	Alberta	Rubiaceae	Gentianales	LN680336	Y18708
Albertisia laurifolia	Albertisia	Menispermaceae	Ranunculales	EF143849	HQ260757
Albertisia papuana	Albertisia	Menispermaceae	Ranunculales	MH034429	FJ026460
Albertisia porcata	Albertisia	Menispermaceae	Ranunculales	KX384047	HQ260758
Albidella nymphaeifolia	Albidella	Alismataceae	Alismatales	EF088125	KU499837
Albizia adianthifolia	Albizia	Fabaceae	Fabales	KX302294	JX572252
Albizia adinocephala	Albizia	Fabaceae	Fabales	AF523092	JQ591553
Albizia amara	Albizia	Fabaceae	Fabales	MG737431	JX856628
Albizia anthelmintica	Albizia	Fabaceae	Fabales	KX302295	JX572254
Albizia brevifolia	Albizia	Fabaceae	Fabales	KX302300	JF265276
Albizia coriaria*	Albizia	Fabaceae	Fabales	MN370264	MN366676
Albizia corniculata	Albizia	Fabaceae	Fabales	AB924990	AB925616
Albizia ferruginea	Albizia	Fabaceae	Fabales	KX302303	--
Albizia forbesii	Albizia	Fabaceae	Fabales	JX517431	JF265277
Albizia glaberrima	Albizia	Fabaceae	Fabales	JX518104	JX572256
Albizia gummifera	Albizia	Fabaceae	Fabales	KX146347	KU568132
Albizia harveyi	Albizia	Fabaceae	Fabales	EU812003	JF265278
Albizia julibrissin	Albizia	Fabaceae	Fabales	MH552032	Z70147
Albizia kalkora	Albizia	Fabaceae	Fabales	HQ427295	HQ427141
Albizia myriophylla	Albizia	Fabaceae	Fabales	AB504374	--
Albizia niopoides	Albizia	Fabaceae	Fabales	MG718910	JQ591570
Albizia petersiana	Albizia	Fabaceae	Fabales	JX517499	JF265279
Albizia procera	Albizia	Fabaceae	Fabales	EU812033	KC417044
Albizia sinaloensis	Albizia	Fabaceae	Fabales	AF524966	--
Albizia suluensis	Albizia	Fabaceae	Fabales	JX517858	JX572259
Albizia tanganyicensis	Albizia	Fabaceae	Fabales	JF270636	JF265280
Albizia versicolor	Albizia	Fabaceae	Fabales	AF274210	JF265281
Albizia zimmermannii	Albizia	Fabaceae	Fabales	JX517424	JX572261
Albizia zygia	Albizia	Fabaceae	Fabales	KX119347	KX119256
Albuca abyssinica	Albuca	Hyacinthaceae	Asparagales	AM902391	AM902289
Albuca acuminata	Albuca	Hyacinthaceae	Asparagales	AM902433	AM902339
Albuca amboensis	Albuca	Hyacinthaceae	Asparagales	AM902392	AM902290
Albuca canadensis	Albuca	Hyacinthaceae	Asparagales	AM902432	AM902338
Albuca concordiana	Albuca	Hyacinthaceae	Asparagales	AM902397	AM902296
Albuca consanguinea	Albuca	Hyacinthaceae	Asparagales	JX090313	JX090406
Albuca cooperi	Albuca	Hyacinthaceae	Asparagales	--	HQ645918
Albuca deserticola	Albuca	Hyacinthaceae	Asparagales	AM902412	AM902311
Albuca fragrans	Albuca	Hyacinthaceae	Asparagales	--	HQ645919
Albuca glandulosa	Albuca	Hyacinthaceae	Asparagales	--	HQ645920
Albuca kirkii	Albuca	Hyacinthaceae	Asparagales	NC_032697	NC_032697
Albuca pendula	Albuca	Hyacinthaceae	Asparagales	JX090314	HQ645921
Albuca rupestris	Albuca	Hyacinthaceae	Asparagales	--	HQ645922
Albuca secunda	Albuca	Hyacinthaceae	Asparagales	AM992674	AM992647
Albuca semipedalis	Albuca	Hyacinthaceae	Asparagales	JX090392	JX090468
Albuca setosa	Albuca	Hyacinthaceae	Asparagales	AM902393	AM902292
Albuca suaveolens	Albuca	Hyacinthaceae	Asparagales	AM902396	AM902295
Albuca tortuosa	Albuca	Hyacinthaceae	Asparagales	AM902395	AM902294
Albuca unifolia	Albuca	Hyacinthaceae	Asparagales	AM902419	AM902319
Albuca virens	Albuca	Hyacinthaceae	Asparagales	--	HQ645915
Alcea rosea	Alcea	Malvaceae	Malvales	MG946949	MG946816
Alchemilla filicaulis	Alchemilla	Rosaceae	Rosales	KF997456	JN891526
Alchemilla glabra	Alchemilla	Rosaceae	Rosales	JN895008	JN891354
Alchemilla japonica	Alchemilla	Rosaceae	Rosales	AB073681	--
Alchemilla mollis	Alchemilla	Rosaceae	Rosales	KF997444	U06792
Alchemilla xanthochlora	Alchemilla	Rosaceae	Rosales	JN895898	JN890788
Alchornea cordifolia	Alchornea	Euphorbiaceae	Malpighiales	--	AY794959
Alchornea costaricensis	Alchornea	Euphorbiaceae	Malpighiales	--	JQ591397
Alchornea hirtella	Alchornea	Euphorbiaceae	Malpighiales	JX518052	JX572262
Alchornea latifolia	Alchornea	Euphorbiaceae	Malpighiales	GQ981929	HM446755
Alchornea laxiflora	Alchornea	Euphorbiaceae	Malpighiales	JX517659	AY794957
Alchornea trewioides	Alchornea	Euphorbiaceae	Malpighiales	HQ415348	GU441783
Alchornea triplinervia	Alchornea	Euphorbiaceae	Malpighiales	--	KF981217
Alchorneopsis floribunda	Alchorneopsis	Euphorbiaceae	Malpighiales	HM446655	HM446756
Aldina latifolia	Aldina	Fabaceae	Fabales	KP177924	U74252
Aldrovanda vesiculosa	Aldrovanda	Droseraceae	Caryophyllales	MK397911	AY096106
Alectra orobanchoides	Alectra	Orobanchaceae	Lamiales	AF489960	AF026819
Alectra sessiliflora	Alectra	Orobanchaceae	Lamiales	AF051977	AF026820
Alectryon connatus	Alectryon	Sapindaceae	Sapindales	AY724341	AY724341
Alectryon coriaceus	Alectryon	Sapindaceae	Sapindales	EU721039	KM895519
Aleisanthia rupestris	Aleisanthia	Rubiaceae	Gentianales	HM119506	HM164153
Aleisanthiopsis distantiflora	Aleisanthiopsis	Rubiaceae	Gentianales	KJ815670	EU817411
Alepidocline annua	Alepidocline	Asteraceae	Asterales	AY215759	AY215079
Aletris alpestris	Aletris	Nartheciaceae	Dioscoreales	JN086366	--
Aletris capitata	Aletris	Nartheciaceae	Dioscoreales	JN086365	--
Aletris cinerascens	Aletris	Nartheciaceae	Dioscoreales	JN086374	--
Aletris farinosa	Aletris	Nartheciaceae	Dioscoreales	MK509390	MG226709
Aletris foliata	Aletris	Nartheciaceae	Dioscoreales	KU127436	LC376999
Aletris glabra	Aletris	Nartheciaceae	Dioscoreales	KX526706	JN417507
Aletris glandulifera	Aletris	Nartheciaceae	Dioscoreales	JN086346	--
Aletris gracilis	Aletris	Nartheciaceae	Dioscoreales	JN086372	--
Aletris laxiflora	Aletris	Nartheciaceae	Dioscoreales	JN086370	AB679383
Aletris lutea	Aletris	Nartheciaceae	Dioscoreales	AB040173	EU186231
Aletris megalantha	Aletris	Nartheciaceae	Dioscoreales	JN086373	--
Aletris obovata	Aletris	Nartheciaceae	Dioscoreales	KJ772530	KJ773254
Aletris pauciflora	Aletris	Nartheciaceae	Dioscoreales	MF786884	MF786633
Aletris pedicellata	Aletris	Nartheciaceae	Dioscoreales	JN086375	--
Aletris scopulorum	Aletris	Nartheciaceae	Dioscoreales	JN086378	--
Aletris spicata	Aletris	Nartheciaceae	Dioscoreales	AB088834	AB088834
Aletris stenoloba	Aletris	Nartheciaceae	Dioscoreales	JN086376	AB679388
Aletris yaanica	Aletris	Nartheciaceae	Dioscoreales	JN086348	--
Aleurites moluccanus	Aleurites	Euphorbiaceae	Malpighiales	LK021377	AY794883
Alexa bauhiniiflora	Alexa	Fabaceae	Fabales	KY118240	--
Alexa canaracunensis	Alexa	Fabaceae	Fabales	JQ669613	--
Alexa grandiflora	Alexa	Fabaceae	Fabales	KY118239	--
Alexa wachenheimii	Alexa	Fabaceae	Fabales	JQ626338	JQ625719
Alexfloydia repens	Alexfloydia	Poaceae	Poales	HE574420	HE573337
Alexgeorgea ganopoda	Alexgeorgea	Restionaceae	Poales	KF181911	AF148759
Alexgeorgea subterranea	Alexgeorgea	Restionaceae	Poales	GQ409034	GQ408918
Alfaropsis roxburghiana	Alfaropsis	Juglandaceae	Fagales	HQ415289	HQ415111
Alfredia cernua	Alfredia	Asteraceae	Asterales	AY826225	KC589785
Alfredia nivea	Alfredia	Asteraceae	Asterales	AY826226	KC589786
Algrizea macrochlamys	Algrizea	Myrtaceae	Myrtales	AM489975	--
Alhagi maurorum	Alhagi	Fabaceae	Fabales	AY386880	--
Alhagi sparsifolia	Alhagi	Fabaceae	Fabales	KX942352	KX942281
Alibertia edulis	Alibertia	Rubiaceae	Gentianales	GQ981930	Z68843
Aliciella hutchinsifolia	Aliciella	Polemoniaceae	Ericales	L34186	--
Aliciella latifolia	Aliciella	Polemoniaceae	Ericales	L48578	--
Aliciella leptomeria	Aliciella	Polemoniaceae	Ericales	L34196	--
Aliciella mcvickerae	Aliciella	Polemoniaceae	Ericales	EU628537	--
Aliciella subnuda	Aliciella	Polemoniaceae	Ericales	L48582	--
Aliciella tenuis	Aliciella	Polemoniaceae	Ericales	EU628536	--
Aliciella triodon	Aliciella	Polemoniaceae	Ericales	EU628535	--
Alinula lipocarphoides	Alinula	Cyperaceae	Poales	--	AM999784
Alinula paradoxa	Alinula	Cyperaceae	Poales	--	FN870758
Alisma canaliculatum	Alisma	Alismataceae	Alismatales	AB040179	JF781042
Alisma gramineum	Alisma	Alismataceae	Alismatales	KX677454	MG766454
Alisma lanceolatum	Alisma	Alismataceae	Alismatales	KX677493	KX678931
Alisma nanum	Alisma	Alismataceae	Alismatales	JF781066	JF781040
Alisma triviale	Alisma	Alismataceae	Alismatales	KX677272	MG228133
Alistilus jumellei	Alistilus	Fabaceae	Fabales	JN008192	--
Alkanna orientalis	Alkanna	Boraginaceae	Boraginales	EU919612	EU599850
Alkanna tinctoria	Alkanna	Boraginaceae	Boraginales	EU919614	EU599849
Allagoptera arenaria	Allagoptera	Arecoideae	Arecales	AM114635	AY044631
Allagoptera caudescens	Allagoptera	Arecoideae	Arecales	--	AJ829902
Allamanda blanchetii	Allamanda	Apocynaceae	Gentianales	MF350217	JX683836
Allamanda cathartica	Allamanda	Apocynaceae	Gentianales	KJ593763	X91759
Allamanda schottii	Allamanda	Apocynaceae	Gentianales	MG963232	DQ660626
Allantoma lineata	Allantoma	Lecythidaceae	Ericales	MF359941	AF077657
Allenrolfea occidentalis	Allenrolfea	Amaranthaceae	Caryophyllales	KY941496	AY270052
Allenrolfea vaginata	Allenrolfea	Amaranthaceae	Caryophyllales	KU975309	KU975273
Allexis obanensis	Allexis	Violaceae	Malpighiales	AB354475	AB354403
Allexis zygomorpha	Allexis	Violaceae	Malpighiales	--	KC699563
Alliaria petiolata	Alliaria	Brassicaceae	Brassicales	MK509392	JQ933212
Allionia choisyi	Allionia	Nyctaginaceae	Caryophyllales	KY952315	FR775286
Allionia incarnata	Allionia	Nyctaginaceae	Caryophyllales	KY952316	AY042540
Allium altaicum	Allium	Amaryllidaceae	Asparagales	NC_040972	AF206731
Allium ampeloprasum	Allium	Amaryllidaceae	Asparagales	HM850502	KP835939
Allium canadense	Allium	Amaryllidaceae	Asparagales	MG217078	MG227345
Allium carinatum	Allium	Amaryllidaceae	Asparagales	--	HE963312
Allium cepa	Allium	Amaryllidaceae	Asparagales	MK089932	MK090209
Allium chrysocephalum	Allium	Amaryllidaceae	Asparagales	MH992109	HQ690513
Allium condensatum	Allium	Amaryllidaceae	Asparagales	HQ690743	HQ690462
Allium cyaneum	Allium	Amaryllidaceae	Asparagales	HQ690714	HQ690490
Allium fistulosum	Allium	Amaryllidaceae	Asparagales	MK089933	MK090210
Allium forrestii	Allium	Amaryllidaceae	Asparagales	HQ690713	JX017602
Allium macranthum	Allium	Amaryllidaceae	Asparagales	HQ690298	JX017626
Allium macrostemon	Allium	Amaryllidaceae	Asparagales	KC704477	KC704747
Allium mairei	Allium	Amaryllidaceae	Asparagales	HQ690744	JX017612
Allium maowenense	Allium	Amaryllidaceae	Asparagales	MH992111	HQ690504
Allium microdictyon	Allium	Amaryllidaceae	Asparagales	MG282031	JF972893
Allium monanthum	Allium	Amaryllidaceae	Asparagales	KC704480	KC704750
Allium ovalifolium	Allium	Amaryllidaceae	Asparagales	HQ690693	JX017615
Allium plurifoliatum	Allium	Amaryllidaceae	Asparagales	HQ690323	HQ690464
Allium prattii	Allium	Amaryllidaceae	Asparagales	NC_037432	NC_037432
Allium przewalskianum	Allium	Amaryllidaceae	Asparagales	HQ690330	HQ690451
Allium ramosum	Allium	Amaryllidaceae	Asparagales	HQ690716	JX017604
Allium rude	Allium	Amaryllidaceae	Asparagales	MH992112	HQ690494
Allium sacculiferum	Allium	Amaryllidaceae	Asparagales	KC704484	KC704754
Allium sativum	Allium	Amaryllidaceae	Asparagales	MK089934	MK090211
Allium scorodoprasum	Allium	Amaryllidaceae	Asparagales	KC704485	KC704755
Allium senescens	Allium	Amaryllidaceae	Asparagales	HQ690711	KC704758
Allium siculum	Allium	Amaryllidaceae	Asparagales	--	Z69200
Allium sikkimense	Allium	Amaryllidaceae	Asparagales	KT280177	JX017605
Allium sphaerocephalon	Allium	Amaryllidaceae	Asparagales	KF997345	KX282524
Allium subhirsutum	Allium	Amaryllidaceae	Asparagales	--	Z69205
Allium taquetii	Allium	Amaryllidaceae	Asparagales	KC704492	KC704762
Allium textile	Allium	Amaryllidaceae	Asparagales	--	MG226303
Allium thunbergii	Allium	Amaryllidaceae	Asparagales	KC704495	KC704765
Allium tricoccum	Allium	Amaryllidaceae	Asparagales	MK509395	MG226141
Allium triquetrum	Allium	Amaryllidaceae	Asparagales	HM850503	HM849755
Allium tuberosum	Allium	Amaryllidaceae	Asparagales	MF350142	MF349677
Allium tubiflorum	Allium	Amaryllidaceae	Asparagales	HQ690680	JX017599
Allium ursinum	Allium	Amaryllidaceae	Asparagales	MH157875	MH157875
Allium victorialis	Allium	Amaryllidaceae	Asparagales	NC_037240	NC_037240
Allium vineale	Allium	Amaryllidaceae	Asparagales	HM850504	MG228018
Allium wallichii	Allium	Amaryllidaceae	Asparagales	HQ690724	JX017625
Allium xichuanense	Allium	Amaryllidaceae	Asparagales	MH992113	HQ690496
Allocassine laurifolia	Allocassine	Celastraceae	Celastrales	DQ217551	JX572264
Allocasuarina acutivalvis	Allocasuarina	Casuarinaceae	Fagales	AY191669	--
Allocasuarina brachystachya	Allocasuarina	Casuarinaceae	Fagales	AY191647	--
Allocasuarina campestris	Allocasuarina	Casuarinaceae	Fagales	AY191666	--
Allocasuarina corniculata	Allocasuarina	Casuarinaceae	Fagales	AY191672	--
Allocasuarina crassa	Allocasuarina	Casuarinaceae	Fagales	AY191644	--
Allocasuarina decaisneana	Allocasuarina	Casuarinaceae	Fagales	AY191677	--
Allocasuarina decussata	Allocasuarina	Casuarinaceae	Fagales	AY033855	AY033855
Allocasuarina dielsiana	Allocasuarina	Casuarinaceae	Fagales	AY191664	--
Allocasuarina diminuta	Allocasuarina	Casuarinaceae	Fagales	AY191643	--
Allocasuarina distyla	Allocasuarina	Casuarinaceae	Fagales	AY191638	--
Allocasuarina duncanii	Allocasuarina	Casuarinaceae	Fagales	AY191625	--
Allocasuarina emuina	Allocasuarina	Casuarinaceae	Fagales	AY191634	--
Allocasuarina eriochlamys	Allocasuarina	Casuarinaceae	Fagales	AY191663	--
Allocasuarina fibrosa	Allocasuarina	Casuarinaceae	Fagales	AY191675	--
Allocasuarina fraseriana	Allocasuarina	Casuarinaceae	Fagales	AY191658	--
Allocasuarina glareicola	Allocasuarina	Casuarinaceae	Fagales	AY191641	--
Allocasuarina globosa	Allocasuarina	Casuarinaceae	Fagales	AY191661	--
Allocasuarina grampiana	Allocasuarina	Casuarinaceae	Fagales	AY191626	--
Allocasuarina grevilleoides	Allocasuarina	Casuarinaceae	Fagales	AY191676	--
Allocasuarina gymnanthera	Allocasuarina	Casuarinaceae	Fagales	AY191635	--
Allocasuarina helmsii	Allocasuarina	Casuarinaceae	Fagales	AY191667	--
Allocasuarina huegeliana	Allocasuarina	Casuarinaceae	Fagales	AY191655	--
Allocasuarina humilis	Allocasuarina	Casuarinaceae	Fagales	AY191619	--
Allocasuarina inophloia	Allocasuarina	Casuarinaceae	Fagales	AY191653	--
Allocasuarina lehmanniana	Allocasuarina	Casuarinaceae	Fagales	AY033851	AY033851
Allocasuarina littoralis	Allocasuarina	Casuarinaceae	Fagales	AY033849	AY033849
Allocasuarina luehmannii	Allocasuarina	Casuarinaceae	Fagales	AY191673	--
Allocasuarina mackliniana	Allocasuarina	Casuarinaceae	Fagales	AY191633	--
Allocasuarina media	Allocasuarina	Casuarinaceae	Fagales	AY191623	--
Allocasuarina microstachya	Allocasuarina	Casuarinaceae	Fagales	AY191621	--
Allocasuarina misera	Allocasuarina	Casuarinaceae	Fagales	AY191630	--
Allocasuarina monilifera	Allocasuarina	Casuarinaceae	Fagales	AY191624	--
Allocasuarina nana	Allocasuarina	Casuarinaceae	Fagales	AY191622	MH748820
Allocasuarina ophiolitica	Allocasuarina	Casuarinaceae	Fagales	AY191639	--
Allocasuarina paludosa	Allocasuarina	Casuarinaceae	Fagales	AY191649	--
Allocasuarina paradoxa	Allocasuarina	Casuarinaceae	Fagales	AY191632	--
Allocasuarina pinaster	Allocasuarina	Casuarinaceae	Fagales	AY191674	--
Allocasuarina portuensis	Allocasuarina	Casuarinaceae	Fagales	AY191645	--
Allocasuarina pusilla	Allocasuarina	Casuarinaceae	Fagales	AY191631	--
Allocasuarina rigida	Allocasuarina	Casuarinaceae	Fagales	AY191650	--
Allocasuarina rupicola	Allocasuarina	Casuarinaceae	Fagales	AY191646	--
Allocasuarina scleroclada	Allocasuarina	Casuarinaceae	Fagales	AY191665	--
Allocasuarina simulans	Allocasuarina	Casuarinaceae	Fagales	AY191636	--
Allocasuarina spinosissima	Allocasuarina	Casuarinaceae	Fagales	AY191671	--
Allocasuarina tessellata	Allocasuarina	Casuarinaceae	Fagales	AY191670	--
Allocasuarina thalassoscopica	Allocasuarina	Casuarinaceae	Fagales	AY191642	--
Allocasuarina thuyoides	Allocasuarina	Casuarinaceae	Fagales	AY191618	--
Allocasuarina tortiramula	Allocasuarina	Casuarinaceae	Fagales	AY191662	--
Allocasuarina torulosa	Allocasuarina	Casuarinaceae	Fagales	AY033850	AY033850
Allocasuarina verticillata	Allocasuarina	Casuarinaceae	Fagales	AY191657	X69527
Allocasuarina zephyrea	Allocasuarina	Casuarinaceae	Fagales	AY191628	--
Allochrusa versicolor	Allochrusa	Caryophyllaceae	Caryophyllales	AY936323	--
Alloispermum scabrifolium	Alloispermum	Asteraceae	Asterales	AY215760	AY215080
Allolepis texana	Allolepis	Poaceae	Poales	JF729082	FN870759
Allomaieta ebejicosana	Allomaieta	Melastomataceae	Myrtales	--	JF831986
Allomaieta hirsuta	Allomaieta	Melastomataceae	Myrtales	--	JF831988
Allomaieta pancurana	Allomaieta	Melastomataceae	Myrtales	--	JF831993
Allomarkgrafia brenesiana	Allomarkgrafia	Apocynaceae	Gentianales	EF456340	--
Allomarkgrafia plumeriiflora	Allomarkgrafia	Apocynaceae	Gentianales	KY524192	--
Alloneuron ulei	Alloneuron	Melastomataceae	Myrtales	--	JF831996
Allophyllum divaricatum	Allophyllum	Polemoniaceae	Ericales	EU628542	--
Allophyllum gilioides	Allophyllum	Polemoniaceae	Ericales	HQ116934	--
Allophyllum glutinosum	Allophyllum	Polemoniaceae	Ericales	L48564	--
Allophylus africanus	Allophylus	Sapindaceae	Sapindales	JN191100	JX572265
Allophylus angustatus	Allophylus	Sapindaceae	Sapindales	--	FJ038153
Allophylus arboreus	Allophylus	Sapindaceae	Sapindales	EU721118	GU816986
Allophylus cobbe	Allophylus	Sapindaceae	Sapindales	MH332530	AY128248
Allophylus dregeanus	Allophylus	Sapindaceae	Sapindales	JX518230	JX572266
Allophylus latifolius	Allophylus	Sapindaceae	Sapindales	--	JQ626325
Allophylus megaphyllus	Allophylus	Sapindaceae	Sapindales	KC627539	KC628475
Allophylus natalensis	Allophylus	Sapindaceae	Sapindales	AY724268	AY724268
Allophylus psilospermus	Allophylus	Sapindaceae	Sapindales	JQ589126	GQ981658
Allophylus racemosus	Allophylus	Sapindaceae	Sapindales	KJ012459	JQ593998
Allophylus rubifolius	Allophylus	Sapindaceae	Sapindales	JX517604	JX572267
Allophylus serratus	Allophylus	Sapindaceae	Sapindales	AB925068	KF432069
Alloschemone occidentalis	Alloschemone	Araceae	Alismatales	AM920566	AM905744
Allosidastrum pyramidatum	Allosidastrum	Malvaceae	Malvales	JQ588217	JQ592491
Alloteropsis angusta	Alloteropsis	Poaceae	Poales	KX752090	KX752090
Alloteropsis cimicina	Alloteropsis	Poaceae	Poales	MF998892	MF998232
Alloteropsis paniculata	Alloteropsis	Poaceae	Poales	LT593946	LT593955
Alloteropsis papillosa	Alloteropsis	Poaceae	Poales	HE574025	FR845811
Alloteropsis semialata	Alloteropsis	Poaceae	Poales	MF998891	MF998231
Alloxylon flammeum	Alloxylon	Proteaceae	Proteales	JQ257168	DQ875856
Alluaudia ascendens	Alluaudia	Didiereaceae	Caryophyllales	KY952318	AY042541
Alluaudia comosa	Alluaudia	Didiereaceae	Caryophyllales	HQ620838	--
Alluaudia dumosa	Alluaudia	Didiereaceae	Caryophyllales	HQ620839	--
Alluaudia humbertii	Alluaudia	Didiereaceae	Caryophyllales	HQ620840	--
Alluaudia montagnacii	Alluaudia	Didiereaceae	Caryophyllales	HQ620841	--
Alluaudia procera	Alluaudia	Didiereaceae	Caryophyllales	MK397912	M62563
Alluaudiopsis marnieriana	Alluaudiopsis	Didiereaceae	Caryophyllales	HQ620843	--
Alniphyllum fortunei	Alniphyllum	Styracaceae	Ericales	HQ427279	HQ427122
Alnus acuminata	Alnus	Betulaceae	Fagales	FJ011815	FJ423674
Alnus alnobetula	Alnus	Betulaceae	Fagales	KX677572	FJ844588
Alnus cordata	Alnus	Betulaceae	Fagales	NC_036751	FJ844569
Alnus cremastogyne	Alnus	Betulaceae	Fagales	NC_040996	JF940705
Alnus fauriei	Alnus	Betulaceae	Fagales	--	FJ844572
Alnus firma	Alnus	Betulaceae	Fagales	AB060053	AB060562
Alnus formosana	Alnus	Betulaceae	Fagales	KF419024	FJ844573
Alnus glutinosa	Alnus	Betulaceae	Fagales	NC_039930	EU644678
Alnus hirsuta	Alnus	Betulaceae	Fagales	MF350033	JF940706
Alnus incana	Alnus	Betulaceae	Fagales	KX677650	FJ844583
Alnus japonica	Alnus	Betulaceae	Fagales	NC_036753	FJ844577
Alnus mandshurica	Alnus	Betulaceae	Fagales	KF419036	JF940717
Alnus maritima	Alnus	Betulaceae	Fagales	MF136511	FJ844579
Alnus matsumurae	Alnus	Betulaceae	Fagales	FJ844595	FJ844578
Alnus nepalensis	Alnus	Betulaceae	Fagales	NC_039991	FJ844581
Alnus nitida	Alnus	Betulaceae	Fagales	NC_036755	FJ844580
Alnus orientalis	Alnus	Betulaceae	Fagales	NC_036756	FJ844582
Alnus rhombifolia	Alnus	Betulaceae	Fagales	--	JF940720
Alnus rubra	Alnus	Betulaceae	Fagales	KX677579	MG356709
Alnus serrulata	Alnus	Betulaceae	Fagales	KJ772532	FJ844584
Alnus serrulatoides	Alnus	Betulaceae	Fagales	FJ844603	FJ844586
Alnus subcordata	Alnus	Betulaceae	Fagales	NC_036758	FJ844585
Alnus trabeculosa	Alnus	Betulaceae	Fagales	FJ844604	JF940724
Alocasia cucullata	Alocasia	Araceae	Alismatales	JF828122	JF828104
Alocasia macrorrhizos	Alocasia	Araceae	Alismatales	LC461938	JF828103
Alocasia odora	Alocasia	Araceae	Alismatales	EU193584	JQ933213
Alocasia perakensis	Alocasia	Araceae	Alismatales	JQ238851	--
Alocasia sanderiana	Alocasia	Araceae	Alismatales	EU193583	EU193192
Aloe aageodonta	Aloe	Xanthorrhoeaceae	Asparagales	KJ557716	KU748219
Aloe aculeata	Aloe	Xanthorrhoeaceae	Asparagales	KJ557717	KF013363
Aloe africana	Aloe	Xanthorrhoeaceae	Asparagales	JX518056	KF013364
Aloe albida	Aloe	Xanthorrhoeaceae	Asparagales	JX517401	JX572269
Aloe albiflora	Aloe	Xanthorrhoeaceae	Asparagales	KC893697	--
Aloe alooides	Aloe	Xanthorrhoeaceae	Asparagales	JX518239	JX572270
Aloe angelica	Aloe	Xanthorrhoeaceae	Asparagales	JQ024109	--
Aloe anivoranoensis	Aloe	Xanthorrhoeaceae	Asparagales	JX517497	JX572271
Aloe ankoberensis	Aloe	Xanthorrhoeaceae	Asparagales	KJ557719	--
Aloe arborescens	Aloe	Xanthorrhoeaceae	Asparagales	AY323723	AY323646
Aloe archeri	Aloe	Xanthorrhoeaceae	Asparagales	KU748258	--
Aloe arenicola	Aloe	Xanthorrhoeaceae	Asparagales	KJ557721	JQ024487
Aloe babatiensis	Aloe	Xanthorrhoeaceae	Asparagales	KJ557723	KF013366
Aloe bakeri	Aloe	Xanthorrhoeaceae	Asparagales	MG776060	Z73680
Aloe benishangulana	Aloe	Xanthorrhoeaceae	Asparagales	KJ557725	--
Aloe bowiea	Aloe	Xanthorrhoeaceae	Asparagales	KU937284	JQ024492
Aloe branddraaiensis	Aloe	Xanthorrhoeaceae	Asparagales	KJ557726	--
Aloe brandhamii	Aloe	Xanthorrhoeaceae	Asparagales	KJ557727	--
Aloe brevifolia	Aloe	Xanthorrhoeaceae	Asparagales	KJ557728	JX572275
Aloe broomii	Aloe	Xanthorrhoeaceae	Asparagales	KC893699	--
Aloe buhrii	Aloe	Xanthorrhoeaceae	Asparagales	JQ024118	KU748386
Aloe bulbillifera	Aloe	Xanthorrhoeaceae	Asparagales	MG776061	AJ512305
Aloe bussei	Aloe	Xanthorrhoeaceae	Asparagales	KJ557731	--
Aloe cameronii	Aloe	Xanthorrhoeaceae	Asparagales	KJ557732	--
Aloe camperi	Aloe	Xanthorrhoeaceae	Asparagales	KJ557733	--
Aloe cannellii	Aloe	Xanthorrhoeaceae	Asparagales	JQ024119	JQ024495
Aloe capitata	Aloe	Xanthorrhoeaceae	Asparagales	MG776063	--
Aloe castanea	Aloe	Xanthorrhoeaceae	Asparagales	KC893700	--
Aloe chabaudii	Aloe	Xanthorrhoeaceae	Asparagales	KJ557735	KF013374
Aloe challisii	Aloe	Xanthorrhoeaceae	Asparagales	JX517888	JX572276
Aloe cheranganiensis	Aloe	Xanthorrhoeaceae	Asparagales	KJ557736	--
Aloe chlorantha	Aloe	Xanthorrhoeaceae	Asparagales	KJ557737	--
Aloe chortolirioides	Aloe	Xanthorrhoeaceae	Asparagales	JX518123	JX572277
Aloe claviflora	Aloe	Xanthorrhoeaceae	Asparagales	KJ557738	--
Aloe comosa	Aloe	Xanthorrhoeaceae	Asparagales	KJ557739	JQ024499
Aloe compressa	Aloe	Xanthorrhoeaceae	Asparagales	MG776065	AY323644
Aloe comptonii	Aloe	Xanthorrhoeaceae	Asparagales	KJ557740	--
Aloe confusa	Aloe	Xanthorrhoeaceae	Asparagales	KU748288	KU748387
Aloe conifera	Aloe	Xanthorrhoeaceae	Asparagales	KJ557742	AJ512303
Aloe craibii	Aloe	Xanthorrhoeaceae	Asparagales	JX517748	JX572278
Aloe dawei	Aloe	Xanthorrhoeaceae	Asparagales	KC893701	KU748388
Aloe debrana	Aloe	Xanthorrhoeaceae	Asparagales	KJ557744	--
Aloe deltoideodonta	Aloe	Xanthorrhoeaceae	Asparagales	MG776068	AJ512304
Aloe deserti	Aloe	Xanthorrhoeaceae	Asparagales	KU748261	--
Aloe dewetii	Aloe	Xanthorrhoeaceae	Asparagales	KJ557746	--
Aloe dewinteri	Aloe	Xanthorrhoeaceae	Asparagales	JQ024125	JQ024500
Aloe diolii	Aloe	Xanthorrhoeaceae	Asparagales	KJ557747	KU748391
Aloe dominella	Aloe	Xanthorrhoeaceae	Asparagales	KJ557749	JX572279
Aloe dyeri	Aloe	Xanthorrhoeaceae	Asparagales	JQ024129	KF013379
Aloe ecklonis	Aloe	Xanthorrhoeaceae	Asparagales	KJ557751	JX572280
Aloe ellenbeckii	Aloe	Xanthorrhoeaceae	Asparagales	KJ557752	KF013378
Aloe erinacea	Aloe	Xanthorrhoeaceae	Asparagales	JQ024130	JQ024505
Aloe esculenta	Aloe	Xanthorrhoeaceae	Asparagales	KJ557753	--
Aloe excelsa	Aloe	Xanthorrhoeaceae	Asparagales	KC893703	JF265284
Aloe falcata	Aloe	Xanthorrhoeaceae	Asparagales	KJ557754	--
Aloe ferox	Aloe	Xanthorrhoeaceae	Asparagales	KU937278	JQ025022
Aloe fibrosa	Aloe	Xanthorrhoeaceae	Asparagales	KJ557755	KF013387
Aloe fleurentinorum	Aloe	Xanthorrhoeaceae	Asparagales	KJ557756	KF013388
Aloe flexilifolia	Aloe	Xanthorrhoeaceae	Asparagales	KJ557757	KU748340
Aloe forbesii	Aloe	Xanthorrhoeaceae	Asparagales	KJ557758	AJ512308
Aloe fosteri	Aloe	Xanthorrhoeaceae	Asparagales	KJ557759	JQ024506
Aloe fouriei	Aloe	Xanthorrhoeaceae	Asparagales	JX517684	JX572283
Aloe gariepensis	Aloe	Xanthorrhoeaceae	Asparagales	KJ557761	--
Aloe glauca	Aloe	Xanthorrhoeaceae	Asparagales	KJ557762	JQ024508
Aloe globuligemma	Aloe	Xanthorrhoeaceae	Asparagales	KJ557763	KF013390
Aloe gneissicola	Aloe	Xanthorrhoeaceae	Asparagales	AY323720	AY323643
Aloe graciliflora	Aloe	Xanthorrhoeaceae	Asparagales	KJ557764	--
Aloe grandidentata	Aloe	Xanthorrhoeaceae	Asparagales	KJ557765	KF013389
Aloe greatheadii	Aloe	Xanthorrhoeaceae	Asparagales	KJ557766	KF733457
Aloe greenii	Aloe	Xanthorrhoeaceae	Asparagales	KJ557767	--
Aloe haworthioides	Aloe	Xanthorrhoeaceae	Asparagales	KJ557768	JQ024513
Aloe hereroensis	Aloe	Xanthorrhoeaceae	Asparagales	JQ024140	JQ024514
Aloe hexapetala	Aloe	Xanthorrhoeaceae	Asparagales	JQ024141	JQ024515
Aloe hildebrandtii	Aloe	Xanthorrhoeaceae	Asparagales	KJ557769	--
Aloe humilis	Aloe	Xanthorrhoeaceae	Asparagales	AY323719	AY323642
Aloe inermis	Aloe	Xanthorrhoeaceae	Asparagales	KJ557771	AJ512288
Aloe integra	Aloe	Xanthorrhoeaceae	Asparagales	JX518102	JX572284
Aloe jucunda	Aloe	Xanthorrhoeaceae	Asparagales	AY323718	AY323641
Aloe juvenna	Aloe	Xanthorrhoeaceae	Asparagales	AY323717	AY323640
Aloe kedongensis	Aloe	Xanthorrhoeaceae	Asparagales	KJ557773	--
Aloe khamiesensis	Aloe	Xanthorrhoeaceae	Asparagales	KJ557774	--
Aloe knersvlakensis	Aloe	Xanthorrhoeaceae	Asparagales	KJ557775	--
Aloe kniphofioides	Aloe	Xanthorrhoeaceae	Asparagales	JX517649	KC960550
Aloe kouebokkeveldensis	Aloe	Xanthorrhoeaceae	Asparagales	JQ024144	KF013399
Aloe krapohliana	Aloe	Xanthorrhoeaceae	Asparagales	KJ557777	--
Aloe kulalensis	Aloe	Xanthorrhoeaceae	Asparagales	KJ557778	KF013397
Aloe lateritia	Aloe	Xanthorrhoeaceae	Asparagales	KJ557779	--
Aloe lavranosii	Aloe	Xanthorrhoeaceae	Asparagales	AY323724	AY323647
Aloe leachii	Aloe	Xanthorrhoeaceae	Asparagales	KJ557780	--
Aloe leptosiphon	Aloe	Xanthorrhoeaceae	Asparagales	KJ557781	--
Aloe lettyae	Aloe	Xanthorrhoeaceae	Asparagales	KJ557782	--
Aloe lineata	Aloe	Xanthorrhoeaceae	Asparagales	JQ024149	JQ024522
Aloe littoralis	Aloe	Xanthorrhoeaceae	Asparagales	KJ557783	KF733456
Aloe longibracteata	Aloe	Xanthorrhoeaceae	Asparagales	KJ557784	--
Aloe lutescens	Aloe	Xanthorrhoeaceae	Asparagales	JQ669523	JQ669553
Aloe macra	Aloe	Xanthorrhoeaceae	Asparagales	KX270415	AJ512301
Aloe maculata	Aloe	Xanthorrhoeaceae	Asparagales	NC_035505	NC_035505
Aloe marlothii	Aloe	Xanthorrhoeaceae	Asparagales	KC893708	KF013402
Aloe mawii	Aloe	Xanthorrhoeaceae	Asparagales	KJ557786	--
Aloe mcloughlinii	Aloe	Xanthorrhoeaceae	Asparagales	KJ557787	--
Aloe melanacantha	Aloe	Xanthorrhoeaceae	Asparagales	KJ557788	JX572287
Aloe microstigma	Aloe	Xanthorrhoeaceae	Asparagales	KJ557789	JQ024525
Aloe minima	Aloe	Xanthorrhoeaceae	Asparagales	KJ557790	--
Aloe modesta	Aloe	Xanthorrhoeaceae	Asparagales	JX517902	JX572288
Aloe monotropa	Aloe	Xanthorrhoeaceae	Asparagales	KJ557791	--
Aloe monticola	Aloe	Xanthorrhoeaceae	Asparagales	KJ557792	--
Aloe munchii	Aloe	Xanthorrhoeaceae	Asparagales	JX517965	KF013406
Aloe mzimbana	Aloe	Xanthorrhoeaceae	Asparagales	KJ557794	KF013407
Aloe ngongensis	Aloe	Xanthorrhoeaceae	Asparagales	KJ557795	--
Aloe niebuhriana	Aloe	Xanthorrhoeaceae	Asparagales	AY323725	AY323648
Aloe nubigena	Aloe	Xanthorrhoeaceae	Asparagales	JX518145	JX572290
Aloe nyeriensis	Aloe	Xanthorrhoeaceae	Asparagales	KU748259	KU748200
Aloe occidentalis	Aloe	Xanthorrhoeaceae	Asparagales	AJ512286	AJ512286
Aloe parvula	Aloe	Xanthorrhoeaceae	Asparagales	MG776078	--
Aloe pearsonii	Aloe	Xanthorrhoeaceae	Asparagales	KJ557797	JQ024526
Aloe peglerae	Aloe	Xanthorrhoeaceae	Asparagales	KJ557798	JX572291
Aloe pembana	Aloe	Xanthorrhoeaceae	Asparagales	KJ557799	--
Aloe percrassa	Aloe	Xanthorrhoeaceae	Asparagales	KJ557800	--
Aloe perfoliata	Aloe	Xanthorrhoeaceae	Asparagales	JX517501	JX572292
Aloe petricola	Aloe	Xanthorrhoeaceae	Asparagales	JQ024157	JQ024529
Aloe pictifolia	Aloe	Xanthorrhoeaceae	Asparagales	KC893710	JQ024530
Aloe pluridens	Aloe	Xanthorrhoeaceae	Asparagales	JX518078	JX572293
Aloe praetermissa	Aloe	Xanthorrhoeaceae	Asparagales	KJ557801	--
Aloe prinslooi	Aloe	Xanthorrhoeaceae	Asparagales	KJ557802	--
Aloe propagulifera	Aloe	Xanthorrhoeaceae	Asparagales	JX517367	JX572294
Aloe purpurea	Aloe	Xanthorrhoeaceae	Asparagales	MG776079	Z73690
Aloe reitzii	Aloe	Xanthorrhoeaceae	Asparagales	KJ557804	--
Aloe retrospiciens	Aloe	Xanthorrhoeaceae	Asparagales	KJ557805	KF013410
Aloe reynoldsii	Aloe	Xanthorrhoeaceae	Asparagales	JQ024160	JQ024532
Aloe rupestris	Aloe	Xanthorrhoeaceae	Asparagales	JX517584	JX572295
Aloe saundersiae	Aloe	Xanthorrhoeaceae	Asparagales	JX517720	JX572296
Aloe schelpei	Aloe	Xanthorrhoeaceae	Asparagales	KJ557807	--
Aloe scobinifolia	Aloe	Xanthorrhoeaceae	Asparagales	AY323687	AJ512307
Aloe secundiflora	Aloe	Xanthorrhoeaceae	Asparagales	KU748257	--
Aloe sinana	Aloe	Xanthorrhoeaceae	Asparagales	KJ557809	--
Aloe sinkatana	Aloe	Xanthorrhoeaceae	Asparagales	KC893711	AJ512306
Aloe somaliensis	Aloe	Xanthorrhoeaceae	Asparagales	AY323716	AY323639
Aloe spicata	Aloe	Xanthorrhoeaceae	Asparagales	KC893712	KF013414
Aloe striata	Aloe	Xanthorrhoeaceae	Asparagales	KJ557776	JQ024537
Aloe succotrina	Aloe	Xanthorrhoeaceae	Asparagales	KJ557813	JQ024539
Aloe suffulta	Aloe	Xanthorrhoeaceae	Asparagales	KJ557814	--
Aloe suprafoliata	Aloe	Xanthorrhoeaceae	Asparagales	AY323715	AY323638
Aloe swynnertonii	Aloe	Xanthorrhoeaceae	Asparagales	KJ557815	--
Aloe thompsoniae	Aloe	Xanthorrhoeaceae	Asparagales	JX518074	JX572297
Aloe thraskii	Aloe	Xanthorrhoeaceae	Asparagales	KJ557816	JQ024542
Aloe tomentosa	Aloe	Xanthorrhoeaceae	Asparagales	LC414535	KF013417
Aloe trichosantha	Aloe	Xanthorrhoeaceae	Asparagales	KJ557817	KF013419
Aloe ukambensis	Aloe	Xanthorrhoeaceae	Asparagales	KJ557818	--
Aloe vanbalenii	Aloe	Xanthorrhoeaceae	Asparagales	KJ557820	KF013421
Aloe vanrooyenii	Aloe	Xanthorrhoeaceae	Asparagales	KJ557821	--
Aloe vaombe	Aloe	Xanthorrhoeaceae	Asparagales	MG776085	--
Aloe vera	Aloe	Xanthorrhoeaceae	Asparagales	LC461870	MK090212
Aloe verecunda	Aloe	Xanthorrhoeaceae	Asparagales	JX518218	JX572298
Aloe viguieri	Aloe	Xanthorrhoeaceae	Asparagales	MG776087	KF013422
Aloe volkensii	Aloe	Xanthorrhoeaceae	Asparagales	KJ557824	KU748333
Aloe vossii	Aloe	Xanthorrhoeaceae	Asparagales	JX518216	JX572299
Aloe vryheidensis	Aloe	Xanthorrhoeaceae	Asparagales	JX517863	KF013380
Aloe weloensis	Aloe	Xanthorrhoeaceae	Asparagales	KJ557825	--
Aloe yemenica	Aloe	Xanthorrhoeaceae	Asparagales	KJ557826	KF013426
Aloe zebrina	Aloe	Xanthorrhoeaceae	Asparagales	KC893720	--
Aloinopsis loganii	Aloinopsis	Aizoaceae	Caryophyllales	KF132643	KF132537
Alonsoa meridionalis	Alonsoa	Scrophulariaceae	Lamiales	HQ384534	--
Alopecurus aequalis	Alopecurus	Poaceae	Poales	MF597152	MH450178
Alopecurus arundinaceus	Alopecurus	Poaceae	Poales	NC_037163	NC_037163
Alopecurus bulbosus	Alopecurus	Poaceae	Poales	JN894201	JN893324
Alopecurus geniculatus	Alopecurus	Poaceae	Poales	MF597155	MF596557
Alopecurus japonicus	Alopecurus	Poaceae	Poales	MH265195	KP711246
Alopecurus magellanicus	Alopecurus	Poaceae	Poales	KX873212	KT960720
Alopecurus myosuroides	Alopecurus	Poaceae	Poales	KM523832	MG225727
Alopecurus pratensis	Alopecurus	Poaceae	Poales	MK509396	MF596562
Alopecurus textilis	Alopecurus	Poaceae	Poales	DQ786881	--
Alophia silvestris	Alophia	Iridaceae	Asparagales	JQ588046	JQ592260
Alophia veracruzana	Alophia	Iridaceae	Asparagales	JQ670433	AJ309678
Alphonsea boniana	Alphonsea	Annonaceae	Magnoliales	AY518809	AY318965
Alphonsea elliptica	Alphonsea	Annonaceae	Magnoliales	AY518807	AY318966
Alphonsea javanica	Alphonsea	Annonaceae	Magnoliales	AY518810	AY318967
Alphonsea kinabaluensis	Alphonsea	Annonaceae	Magnoliales	AY518811	AY318968
Alpinia aquatica	Alpinia	Zingiberaceae	Zingiberales	KJ507832	--
Alpinia calcarata	Alpinia	Zingiberaceae	Zingiberales	KX088472	KX758502
Alpinia chinensis	Alpinia	Zingiberaceae	Zingiberales	EU586175	--
Alpinia conchigera	Alpinia	Zingiberaceae	Zingiberales	KJ507838	KJ871698
Alpinia elegans	Alpinia	Zingiberaceae	Zingiberales	AF478813	JF940734
Alpinia emaculata	Alpinia	Zingiberaceae	Zingiberales	JF953092	JF940736
Alpinia formosana	Alpinia	Zingiberaceae	Zingiberales	FJ496764	JF940738
Alpinia foxworthyi	Alpinia	Zingiberaceae	Zingiberales	AF478814	JF940740
Alpinia glabra	Alpinia	Zingiberaceae	Zingiberales	JF715463	--
Alpinia graminifolia	Alpinia	Zingiberaceae	Zingiberales	JF953103	--
Alpinia guinanensis	Alpinia	Zingiberaceae	Zingiberales	JF953105	JF940748
Alpinia hainanensis	Alpinia	Zingiberaceae	Zingiberales	GQ434103	GU180507
Alpinia intermedia	Alpinia	Zingiberaceae	Zingiberales	FJ496765	LC050451
Alpinia japonica	Alpinia	Zingiberaceae	Zingiberales	EU586176	AB111728
Alpinia jianganfeng	Alpinia	Zingiberaceae	Zingiberales	JF953112	JF940756
Alpinia kwangsiensis	Alpinia	Zingiberaceae	Zingiberales	GU180382	GU180508
Alpinia ligulata	Alpinia	Zingiberaceae	Zingiberales	JF715465	--
Alpinia modesta	Alpinia	Zingiberaceae	Zingiberales	--	KF496318
Alpinia oblongifolia	Alpinia	Zingiberaceae	Zingiberales	JF953118	JF940761
Alpinia officinarum	Alpinia	Zingiberaceae	Zingiberales	EU586172	GU180517
Alpinia oxyphylla	Alpinia	Zingiberaceae	Zingiberales	NC_035895	NC_035895
Alpinia platychilus	Alpinia	Zingiberaceae	Zingiberales	JF953124	JF940770
Alpinia polyantha	Alpinia	Zingiberaceae	Zingiberales	GU180389	GU180514
Alpinia purpurata	Alpinia	Zingiberaceae	Zingiberales	MH603399	MH603399
Alpinia roxburghii	Alpinia	Zingiberaceae	Zingiberales	KC597951	KC598059
Alpinia stachyodes	Alpinia	Zingiberaceae	Zingiberales	JF953130	JF940776
Alpinia zerumbet	Alpinia	Zingiberaceae	Zingiberales	MH603400	MH603400
Alrawia bellii	Alrawia	Hyacinthaceae	Asparagales	JX090315	AM902332
Alseis blackiana	Alseis	Rubiaceae	Gentianales	--	GQ981659
Alseis floribunda	Alseis	Rubiaceae	Gentianales	MG718593	MG718037
Alseis lugonis	Alseis	Rubiaceae	Gentianales	FJ905331	Y18709
Alseis peruviana	Alseis	Rubiaceae	Gentianales	FJ905332	--
Alseodaphne perakensis	Alseodaphne	Lauraceae	Laurales	AJ247144	--
Alseuosmia macrophylla	Alseuosmia	Alseuosmiaceae	Asterales	AJ429378	X87377
Alsodeiopsis staudtii*	Alsodeiopsis	Icacinaceae	Icacinales	MN370392	MN366627
Alsomitra macrocarpa	Alsomitra	Cucurbitaceae	Cucurbitales	DQ536632	DQ535780
Alstonia boonei	Alstonia	Apocynaceae	Gentianales	KC627675	KC627958
Alstonia scholaris	Alstonia	Apocynaceae	Gentianales	MG816832	GQ436401
Alstroemeria andina	Alstroemeria	Alstroemeriaceae	Liliales	JQ404769	AY120366
Alstroemeria angustifolia	Alstroemeria	Alstroemeriaceae	Liliales	JQ404770	AY120358
Alstroemeria aurea	Alstroemeria	Alstroemeriaceae	Liliales	JQ404772	JQ404664
Alstroemeria caryophyllaea	Alstroemeria	Alstroemeriaceae	Liliales	JQ404774	JQ404665
Alstroemeria crispata	Alstroemeria	Alstroemeriaceae	Liliales	JQ404775	JQ404666
Alstroemeria cunha	Alstroemeria	Alstroemeriaceae	Liliales	JQ404776	JQ404667
Alstroemeria foliosa	Alstroemeria	Alstroemeriaceae	Liliales	JQ404779	JQ404672
Alstroemeria fuscovinosa	Alstroemeria	Alstroemeriaceae	Liliales	JQ404780	JQ404673
Alstroemeria graminea	Alstroemeria	Alstroemeriaceae	Liliales	JQ404781	AY120360
Alstroemeria hookeri	Alstroemeria	Alstroemeriaceae	Liliales	JQ404782	JQ404674
Alstroemeria isabellana	Alstroemeria	Alstroemeriaceae	Liliales	JQ404785	JQ404676
Alstroemeria julieae	Alstroemeria	Alstroemeriaceae	Liliales	JQ404786	JQ404677
Alstroemeria ligtu	Alstroemeria	Alstroemeriaceae	Liliales	JQ404788	JQ404679
Alstroemeria longistaminea	Alstroemeria	Alstroemeriaceae	Liliales	JQ404790	JQ404681
Alstroemeria monticola	Alstroemeria	Alstroemeriaceae	Liliales	--	JQ404683
Alstroemeria ochracea	Alstroemeria	Alstroemeriaceae	Liliales	JQ404792	JQ404684
Alstroemeria patagonica	Alstroemeria	Alstroemeriaceae	Liliales	JQ404796	AY120362
Alstroemeria pelegrina	Alstroemeria	Alstroemeriaceae	Liliales	JQ404797	AY120363
Alstroemeria philippii	Alstroemeria	Alstroemeriaceae	Liliales	JQ404799	JQ404689
Alstroemeria presliana	Alstroemeria	Alstroemeriaceae	Liliales	JQ404800	JQ404690
Alstroemeria pseudospathulata	Alstroemeria	Alstroemeriaceae	Liliales	JQ404801	JQ404691
Alstroemeria punctata	Alstroemeria	Alstroemeriaceae	Liliales	JQ404803	JQ404692
Alstroemeria pygmaea	Alstroemeria	Alstroemeriaceae	Liliales	JQ404804	AY120365
Alstroemeria revoluta	Alstroemeria	Alstroemeriaceae	Liliales	JQ404806	JQ404693
Alstroemeria rupestris	Alstroemeria	Alstroemeriaceae	Liliales	JQ404807	JQ404694
Alstroemeria schizanthoides	Alstroemeria	Alstroemeriaceae	Liliales	JQ404808	JQ404695
Alstroemeria sellowiana	Alstroemeria	Alstroemeriaceae	Liliales	JQ404809	JQ404696
Alstroemeria speciosa	Alstroemeria	Alstroemeriaceae	Liliales	JQ404815	JQ404703
Alstroemeria stenopetala	Alstroemeria	Alstroemeriaceae	Liliales	JQ404816	JQ404704
Alstroemeria stenophylla	Alstroemeria	Alstroemeriaceae	Liliales	JQ404817	JQ404705
Alstroemeria umbellata	Alstroemeria	Alstroemeriaceae	Liliales	JQ404818	JQ404706
Alstroemeria versicolor	Alstroemeria	Alstroemeriaceae	Liliales	JQ404819	JQ404707
Alstroemeria werdermannii	Alstroemeria	Alstroemeriaceae	Liliales	JQ404820	JQ404708
Alstroemeria zoellneri	Alstroemeria	Alstroemeriaceae	Liliales	JQ404821	JQ404709
Altensteinia fimbriata	Altensteinia	Orchidaceae	Asparagales	EF065583	FJ571315
Altensteinia virescens	Altensteinia	Orchidaceae	Asparagales	--	FJ571314
Alternanthera altacruzensis	Alternanthera	Amaranthaceae	Caryophyllales	AM887483	--
Alternanthera caracasana	Alternanthera	Amaranthaceae	Caryophyllales	KY952319	HM849761
Alternanthera ficoidea	Alternanthera	Amaranthaceae	Caryophyllales	GQ429069	FR775289
Alternanthera flavescens	Alternanthera	Amaranthaceae	Caryophyllales	AM887484	--
Alternanthera microphylla	Alternanthera	Amaranthaceae	Caryophyllales	AM887485	--
Alternanthera philoxeroides	Alternanthera	Amaranthaceae	Caryophyllales	KJ747622	FR775287
Alternanthera pubiflora	Alternanthera	Amaranthaceae	Caryophyllales	JQ586444	JQ590098
Alternanthera pungens	Alternanthera	Amaranthaceae	Caryophyllales	LT992612	HQ237458
Alternanthera sessilis	Alternanthera	Amaranthaceae	Caryophyllales	MK290576	FR775288
Althaea armeniaca	Althaea	Malvaceae	Malvales	EU346763	--
Althaea cannabina	Althaea	Malvaceae	Malvales	EU346764	--
Althaea hirsuta	Althaea	Malvaceae	Malvales	MG220857	MG247879
Althaea longiflora	Althaea	Malvaceae	Malvales	EU346795	--
Althaea officinalis	Althaea	Malvaceae	Malvales	MK089935	JN891501
Althenia filiformis	Althenia	Potamogetonaceae	Alismatales	AB906833	AB906848
Altingia chinensis	Altingia	Altingiaceae	Saxifragales	AF304542	DQ352376
Altingia excelsa	Altingia	Altingiaceae	Saxifragales	AF304520	AF206732
Altingia gracilipes	Altingia	Altingiaceae	Saxifragales	AF304535	DQ352379
Altingia obovata	Altingia	Altingiaceae	Saxifragales	AF304523	DQ352377
Altingia siamensis	Altingia	Altingiaceae	Saxifragales	AF304521	DQ352375
Altingia yunnanensis	Altingia	Altingiaceae	Saxifragales	GU576679	DQ352378
Altoparadisium chapadense	Altoparadisium	Poaceae	Poales	HE574027	AM849402
Alvaradoa amorphoides	Alvaradoa	Picramniaceae	Picramniales	--	AF123277
Alysicarpus vaginalis	Alysicarpus	Fabaceae	Fabales	MH767980	JQ591574
Alyssum linifolium	Alyssum	Brassicaceae	Brassicales	JF926642	--
Alyssum simplex	Alyssum	Brassicaceae	Brassicales	JF926641	--
Alyxia balansae	Alyxia	Apocynaceae	Gentianales	HG004954	KF181527
Alyxia grandis	Alyxia	Apocynaceae	Gentianales	EF456369	--
Alyxia oblongata	Alyxia	Apocynaceae	Gentianales	EF456370	--
Alyxia reinwardtii	Alyxia	Apocynaceae	Gentianales	LC461730	DQ660627
Alyxia ruscifolia	Alyxia	Apocynaceae	Gentianales	DQ837536	AJ419731
Alyxia sinensis	Alyxia	Apocynaceae	Gentianales	KX911149	EU916741
Alyxia spicata	Alyxia	Apocynaceae	Gentianales	EF456371	KF496374
Alzatea verticillata	Alzatea	Alzateaceae	Myrtales	AY151567	U26316
Amaioua guianensis	Amaioua	Rubiaceae	Gentianales	JQ626364	AM117202
Amaioua intermedia	Amaioua	Rubiaceae	Gentianales	MG718803	KF981282
Amalocalyx microlobus	Amalocalyx	Apocynaceae	Gentianales	EF456261	KF181484
Amalophyllon divaricatum	Amalophyllon	Gesneriaceae	Lamiales	JX196056	KU991206
Amanoa bracteosa*	Amanoa	Phyllanthaceae	Malpighiales	MN370242	MN366772
Amanoa caribaea	Amanoa	Phyllanthaceae	Malpighiales	--	AY663561
Amaranthus acanthochiton	Amaranthus	Amaranthaceae	Caryophyllales	MG685094	--
Amaranthus albus	Amaranthus	Amaranthaceae	Caryophyllales	MK509397	JF940784
Amaranthus arenicola	Amaranthus	Amaranthaceae	Caryophyllales	MG685099	KP318831
Amaranthus asplundii	Amaranthus	Amaranthaceae	Caryophyllales	KC747125	FR775301
Amaranthus australis	Amaranthus	Amaranthaceae	Caryophyllales	MG685101	KJ773260
Amaranthus blitoides	Amaranthus	Amaranthaceae	Caryophyllales	MK509398	HM849762
Amaranthus blitum	Amaranthus	Amaranthaceae	Caryophyllales	MG251304	HM849763
Amaranthus californicus	Amaranthus	Amaranthaceae	Caryophyllales	MG685108	MG249906
Amaranthus caudatus	Amaranthus	Amaranthaceae	Caryophyllales	NC_040143	MG836508
Amaranthus crassipes	Amaranthus	Amaranthaceae	Caryophyllales	MG685119	--
Amaranthus crispus	Amaranthus	Amaranthaceae	Caryophyllales	MG685120	--
Amaranthus deflexus	Amaranthus	Amaranthaceae	Caryophyllales	MG685128	HE963315
Amaranthus fimbriatus	Amaranthus	Amaranthaceae	Caryophyllales	MG685132	--
Amaranthus floridanus	Amaranthus	Amaranthaceae	Caryophyllales	MG685133	--
Amaranthus graecizans	Amaranthus	Amaranthaceae	Caryophyllales	MK290559	KX079632
Amaranthus greggii	Amaranthus	Amaranthaceae	Caryophyllales	MG685139	AY270055
Amaranthus hybridus	Amaranthus	Amaranthaceae	Caryophyllales	MK509399	HM849765
Amaranthus hypochondriacus	Amaranthus	Amaranthaceae	Caryophyllales	MK509400	MG836505
Amaranthus muricatus	Amaranthus	Amaranthaceae	Caryophyllales	MG685152	--
Amaranthus palmeri	Amaranthus	Amaranthaceae	Caryophyllales	MG685155	MG249754
Amaranthus powellii	Amaranthus	Amaranthaceae	Caryophyllales	MK509401	MG248661
Amaranthus praetermissus	Amaranthus	Amaranthaceae	Caryophyllales	MG685160	--
Amaranthus retroflexus	Amaranthus	Amaranthaceae	Caryophyllales	MK509402	JF940789
Amaranthus spinosus	Amaranthus	Amaranthaceae	Caryophyllales	MG685172	HM849766
Amaranthus standleyanus	Amaranthus	Amaranthaceae	Caryophyllales	MG685176	--
Amaranthus tamaulipensis	Amaranthus	Amaranthaceae	Caryophyllales	MG685177	--
Amaranthus tricolor	Amaranthus	Amaranthaceae	Caryophyllales	MG685181	AB050127
Amaranthus tuberculatus	Amaranthus	Amaranthaceae	Caryophyllales	MK509403	MG246613
Amaranthus viridis	Amaranthus	Amaranthaceae	Caryophyllales	MH767768	KY656739
Amaranthus wrightii	Amaranthus	Amaranthaceae	Caryophyllales	MG685193	--
Amaroria soulameoides	Amaroria	Simaroubaceae	Sapindales	--	U38923
Amaryllis belladonna	Amaryllis	Amaryllidaceae	Asparagales	JX903555	JX903144
Amauriopsis dissecta	Amauriopsis	Asteraceae	Asterales	GU817424	GU817741
Ambavia gerrardii	Ambavia	Annonaceae	Magnoliales	AY220435	JQ513886
Ambelania acida	Ambelania	Apocynaceae	Gentianales	MG963234	JQ626070
Amblygonocarpus andongensis	Amblygonocarpus	Fabaceae	Fabales	KX302314	JX572301
Amblyopappus pusillus	Amblyopappus	Asteraceae	Asterales	AF391690	AY215081
Amborella trichopoda	Amborella	Amborellaceae	Amborellales	AF465284	XM_020672445
Ambrosia artemisiifolia	Ambrosia	Asteraceae	Asterales	MK509404	DQ006055
Ambrosia trifida	Ambrosia	Asteraceae	Asterales	MK509406	AY215082
Ambrosina bassii	Ambrosina	Araceae	Alismatales	EU193573	EU193182
Amburana acreana	Amburana	Fabaceae	Fabales	JX295866	--
Amburana cearensis	Amburana	Fabaceae	Fabales	KX816341	MG429823
Amelanchier alnifolia	Amelanchier	Rosaceae	Rosales	KX677776	JQ391244
Amelanchier arborea	Amelanchier	Rosaceae	Rosales	MG704043	JQ391253
Amelanchier bartramiana	Amelanchier	Rosaceae	Rosales	MG220986	JQ391254
Amelanchier canadensis	Amelanchier	Rosaceae	Rosales	JQ390937	JQ391256
Amelanchier interior	Amelanchier	Rosaceae	Rosales	MK509407	JQ391249
Amelanchier intermedia	Amelanchier	Rosaceae	Rosales	JQ390938	JQ391243
Amelanchier laevis	Amelanchier	Rosaceae	Rosales	MG220761	JQ391258
Amelanchier lamarckii	Amelanchier	Rosaceae	Rosales	JQ390943	MG248735
Amelanchier nantucketensis	Amelanchier	Rosaceae	Rosales	JQ390944	JQ391261
Amelanchier ovalis	Amelanchier	Rosaceae	Rosales	JQ390942	JQ391250
Amelanchier sanguinea	Amelanchier	Rosaceae	Rosales	MK509408	JQ391245
Amelanchier spicata	Amelanchier	Rosaceae	Rosales	MK509409	JQ391247
Amelanchier utahensis	Amelanchier	Rosaceae	Rosales	EU025916	JQ391246
Amesiella monticola	Amesiella	Orchidaceae	Asparagales	AB217530	--
Amesiella philippinensis	Amesiella	Orchidaceae	Asparagales	EF079281	DQ195016
Amherstia nobilis	Amherstia	Fabaceae	Fabales	KX161932	AM234234
Amianthium muscitoxicum	Amianthium	Melanthiaceae	Liliales	KP642935	KP643822
Amicia andicola	Amicia	Fabaceae	Fabales	HM027913	--
Amicia lobbiana	Amicia	Fabaceae	Fabales	HM027916	--
Amicia medicaginea	Amicia	Fabaceae	Fabales	HM027917	--
Amicia micrantha	Amicia	Fabaceae	Fabales	HM027918	--
Amicia zygomeris	Amicia	Fabaceae	Fabales	HM027919	--
Amischotolype monosperma	Amischotolype	Commelinaceae	Commelinales	--	AF312239
Amitostigma alpestre	Amitostigma	Orchidaceae	Asparagales	MF945360	KJ451547
Amitostigma farreri	Amitostigma	Orchidaceae	Asparagales	MF945325	KJ451501
Amitostigma gracile	Amitostigma	Orchidaceae	Asparagales	MF945203	KC704860
Amitostigma monanthum	Amitostigma	Orchidaceae	Asparagales	MF945212	JN696421
Amitostigma parceflorum	Amitostigma	Orchidaceae	Asparagales	MF945329	KJ451506
Amitostigma tetralobum	Amitostigma	Orchidaceae	Asparagales	MF945440	MF944875
Amitostigma trifurcatum	Amitostigma	Orchidaceae	Asparagales	MF945332	KJ451509
Ammandra decasperma	Ammandra	Cyroxyloideae	Arecales	EF128232	AJ404838
Ammannia coccinea	Ammannia	Lythraceae	Myrtales	KJ772538	DQ006103
Ammannia latifolia	Ammannia	Lythraceae	Myrtales	KJ772539	AY905404
Ammannia prieuriana	Ammannia	Lythraceae	Myrtales	--	HQ878354
Ammannia robusta	Ammannia	Lythraceae	Myrtales	MK509411	KF724282
Ammi majus	Ammi	Apiaceae	Apiales	KX758458	JQ230996
Ammi trifoliatum	Ammi	Apiaceae	Apiales	HM850718	HM849769
Ammi visnaga	Ammi	Apiaceae	Apiales	HM850725	HM850469
Ammobium alatum	Ammobium	Asteraceae	Asterales	AF151435	--
Ammocharis coranica	Ammocharis	Amaryllidaceae	Asparagales	JX464522	--
Ammocharis longifolia	Ammocharis	Amaryllidaceae	Asparagales	KX783662	KX783860
Ammodendron bifolium	Ammodendron	Fabaceae	Fabales	AY386957	--
Ammophila arenaria	Ammophila	Poaceae	Poales	KJ529326	MF596563
Ammophila breviligulata	Ammophila	Poaceae	Poales	MF597163	MF596565
Amomum angustipetalum	Amomum	Zingiberaceae	Zingiberales	JF715466	--
Amomum austrosinense	Amomum	Zingiberaceae	Zingiberales	AY352015	--
Amomum calyptratum	Amomum	Zingiberaceae	Zingiberales	JF715467	--
Amomum compactum	Amomum	Zingiberaceae	Zingiberales	NC_036992	NC_036992
Amomum coriaceum	Amomum	Zingiberaceae	Zingiberales	JF715468	--
Amomum coriandriodorum	Amomum	Zingiberaceae	Zingiberales	AY352017	--
Amomum dallachyi	Amomum	Zingiberaceae	Zingiberales	--	KF496429
Amomum dealbatum	Amomum	Zingiberaceae	Zingiberales	KX088490	KX758490
Amomum dimorphum	Amomum	Zingiberaceae	Zingiberales	JF715469	--
Amomum durum	Amomum	Zingiberaceae	Zingiberales	JF715470	--
Amomum glabrum	Amomum	Zingiberaceae	Zingiberales	AY352019	JF940834
Amomum gyrolophos	Amomum	Zingiberaceae	Zingiberales	JF715471	--
Amomum koenigii	Amomum	Zingiberaceae	Zingiberales	KY510012	JF940838
Amomum laxesquamosum	Amomum	Zingiberaceae	Zingiberales	KY620219	--
Amomum longiligulare	Amomum	Zingiberaceae	Zingiberales	KY620234	KM411364
Amomum longipetiolatum	Amomum	Zingiberaceae	Zingiberales	AF478822	JF940842
Amomum maximum	Amomum	Zingiberaceae	Zingiberales	KJ872345	KJ871739
Amomum menglaense	Amomum	Zingiberaceae	Zingiberales	AY352026	JF940849
Amomum microcarpum	Amomum	Zingiberaceae	Zingiberales	KY510010	JF940851
Amomum muricarpum	Amomum	Zingiberaceae	Zingiberales	JF953206	JF940854
Amomum neoaurantiacum	Amomum	Zingiberaceae	Zingiberales	JF953209	JF940857
Amomum oliganthum	Amomum	Zingiberaceae	Zingiberales	JF715472	--
Amomum paratsaoko	Amomum	Zingiberaceae	Zingiberales	AY352027	--
Amomum petaloideum	Amomum	Zingiberaceae	Zingiberales	KY620228	JF940859
Amomum propinquum	Amomum	Zingiberaceae	Zingiberales	AY352029	--
Amomum purpureorubrum	Amomum	Zingiberaceae	Zingiberales	AY352030	--
Amomum putrescens	Amomum	Zingiberaceae	Zingiberales	AY352032	--
Amomum quadratolaminare	Amomum	Zingiberaceae	Zingiberales	AY352033	JF940864
Amomum queenslandicum	Amomum	Zingiberaceae	Zingiberales	AY352034	--
Amomum repoeense	Amomum	Zingiberaceae	Zingiberales	KY620243	JF940868
Amomum roseisquamosum	Amomum	Zingiberaceae	Zingiberales	JF715473	--
Amomum scarlatinum	Amomum	Zingiberaceae	Zingiberales	JF953224	--
Amomum sericeum	Amomum	Zingiberaceae	Zingiberales	KY510018	--
Amomum somniculosum	Amomum	Zingiberaceae	Zingiberales	JF715474	--
Amomum subcapitatum	Amomum	Zingiberaceae	Zingiberales	KY510022	JF940870
Amomum uliginosum	Amomum	Zingiberaceae	Zingiberales	KY620227	--
Amomum verrucosum	Amomum	Zingiberaceae	Zingiberales	JF953231	JF940873
Amomum villosum	Amomum	Zingiberaceae	Zingiberales	KY510014	GU180509
Amomum yunnanense	Amomum	Zingiberaceae	Zingiberales	AY352042	--
Amomyrtus meli	Amomyrtus	Myrtaceae	Myrtales	AM489976	--
Amoreuxia wrightii	Amoreuxia	Bixaceae	Malvales	--	Y15142
Amorimia amazonica	Amorimia	Malpighiaceae	Malpighiales	HQ247186	HQ247430
Amorimia camporum	Amorimia	Malpighiaceae	Malpighiales	HQ247187	HQ247431
Amorimia exotropica	Amorimia	Malpighiaceae	Malpighiales	HQ247188	--
Amorimia kariniana	Amorimia	Malpighiaceae	Malpighiales	HQ247189	HQ247432
Amorimia rigida	Amorimia	Malpighiaceae	Malpighiales	HQ247190	HQ247433
Amorimia velutina	Amorimia	Malpighiaceae	Malpighiales	HQ247191	--
Amorpha apiculata	Amorpha	Fabaceae	Fabales	AY391784	--
Amorpha fruticosa	Amorpha	Fabaceae	Fabales	MH552386	U74212
Amorphophallus abyssinicus	Amorphophallus	Araceae	Alismatales	AF387379	AF497060
Amorphophallus albus	Amorphophallus	Araceae	Alismatales	MG644695	EU193179
Amorphophallus amygdaloides	Amorphophallus	Araceae	Alismatales	KU523411	DQ012482
Amorphophallus angolensis	Amorphophallus	Araceae	Alismatales	AF387404	AF497061
Amorphophallus angustispathus	Amorphophallus	Araceae	Alismatales	KU523414	DQ012483
Amorphophallus ankarana	Amorphophallus	Araceae	Alismatales	AF387380	AF497062
Amorphophallus beccarii	Amorphophallus	Araceae	Alismatales	AF387383	AF497064
Amorphophallus borneensis	Amorphophallus	Araceae	Alismatales	KY490461	DQ012484
Amorphophallus brevispathus	Amorphophallus	Araceae	Alismatales	AF387384	AF497065
Amorphophallus bulbifer	Amorphophallus	Araceae	Alismatales	MG644700	KM093839
Amorphophallus canaliculatus	Amorphophallus	Araceae	Alismatales	AF387385	AF497066
Amorphophallus cirrifer	Amorphophallus	Araceae	Alismatales	AF387386	AF497067
Amorphophallus coaetaneus	Amorphophallus	Araceae	Alismatales	AF387381	AF497068
Amorphophallus commutatus	Amorphophallus	Araceae	Alismatales	AF387392	AF497069
Amorphophallus corrugatus	Amorphophallus	Araceae	Alismatales	AF387387	AF497070
Amorphophallus dactylifer	Amorphophallus	Araceae	Alismatales	KY490481	DQ012485
Amorphophallus declinatus	Amorphophallus	Araceae	Alismatales	KY490477	DQ012486
Amorphophallus discophorus	Amorphophallus	Araceae	Alismatales	KY490476	DQ012487
Amorphophallus dracontioides	Amorphophallus	Araceae	Alismatales	AF387389	AF497072
Amorphophallus eburneus	Amorphophallus	Araceae	Alismatales	KY490458	AF497073
Amorphophallus eichleri	Amorphophallus	Araceae	Alismatales	AF387391	AF497074
Amorphophallus galbra	Amorphophallus	Araceae	Alismatales	AF387393	AF497075
Amorphophallus glossophyllus	Amorphophallus	Araceae	Alismatales	KU523446	DQ012489
Amorphophallus henryi	Amorphophallus	Araceae	Alismatales	AF387394	AF497076
Amorphophallus hewitii	Amorphophallus	Araceae	Alismatales	KY490486	DQ012490
Amorphophallus hirsutus	Amorphophallus	Araceae	Alismatales	AF387395	AF497077
Amorphophallus hirtus	Amorphophallus	Araceae	Alismatales	AF387396	AF497078
Amorphophallus hohenackeri	Amorphophallus	Araceae	Alismatales	KU523452	DQ012491
Amorphophallus hottae	Amorphophallus	Araceae	Alismatales	KY490463	AF497079
Amorphophallus impressus	Amorphophallus	Araceae	Alismatales	KU523453	DQ012493
Amorphophallus interruptus	Amorphophallus	Araceae	Alismatales	KU523454	DQ012492
Amorphophallus johnsonii	Amorphophallus	Araceae	Alismatales	KU523455	DQ012494
Amorphophallus konjac	Amorphophallus	Araceae	Alismatales	MG644705	AF497080
Amorphophallus konkanensis	Amorphophallus	Araceae	Alismatales	KU523461	DQ012495
Amorphophallus krausei	Amorphophallus	Araceae	Alismatales	AF387399	AF497081
Amorphophallus lambii	Amorphophallus	Araceae	Alismatales	KY490464	AF497082
Amorphophallus lanuginosus	Amorphophallus	Araceae	Alismatales	KU523463	DQ012496
Amorphophallus laoticus	Amorphophallus	Araceae	Alismatales	KU523464	DQ012497
Amorphophallus lewallei	Amorphophallus	Araceae	Alismatales	AF387401	AF497083
Amorphophallus longiconnectivus	Amorphophallus	Araceae	Alismatales	KU523467	DQ012498
Amorphophallus longituberosus	Amorphophallus	Araceae	Alismatales	AF387402	AF497084
Amorphophallus margaritifer	Amorphophallus	Araceae	Alismatales	AF387403	AF497085
Amorphophallus maxwellii	Amorphophallus	Araceae	Alismatales	AF387405	AF497086
Amorphophallus mossambicensis	Amorphophallus	Araceae	Alismatales	KU523473	DQ012499
Amorphophallus muelleri	Amorphophallus	Araceae	Alismatales	MG644747	EF590499
Amorphophallus napalensis	Amorphophallus	Araceae	Alismatales	AF387408	AF497088
Amorphophallus napiger	Amorphophallus	Araceae	Alismatales	AF387407	AF497089
Amorphophallus ochroleucus	Amorphophallus	Araceae	Alismatales	AF387409	AF497090
Amorphophallus paeoniifolius	Amorphophallus	Araceae	Alismatales	AB088777	MH332398
Amorphophallus palawanensis	Amorphophallus	Araceae	Alismatales	AF387411	AF497092
Amorphophallus pendulus	Amorphophallus	Araceae	Alismatales	KY490456	DQ012501
Amorphophallus pusillus	Amorphophallus	Araceae	Alismatales	AF387413	AF497094
Amorphophallus pygmaeus	Amorphophallus	Araceae	Alismatales	AF387414	AF497095
Amorphophallus rhizomatosus	Amorphophallus	Araceae	Alismatales	AF387415	AF497096
Amorphophallus sagittarius	Amorphophallus	Araceae	Alismatales	AF387416	AF497097
Amorphophallus salmoneus	Amorphophallus	Araceae	Alismatales	KU523493	DQ012502
Amorphophallus scutatus	Amorphophallus	Araceae	Alismatales	KU523498	DQ012503
Amorphophallus smithsonianus	Amorphophallus	Araceae	Alismatales	AF387417	AF497098
Amorphophallus sumawongii	Amorphophallus	Araceae	Alismatales	AF387418	AF497099
Amorphophallus symonianus	Amorphophallus	Araceae	Alismatales	AF387419	AF497100
Amorphophallus taurostigma	Amorphophallus	Araceae	Alismatales	AF387420	AF497101
Amorphophallus tinekeae	Amorphophallus	Araceae	Alismatales	KY490460	DQ012505
Amorphophallus titanum	Amorphophallus	Araceae	Alismatales	KY490479	EF590500
Amorphophallus variabilis	Amorphophallus	Araceae	Alismatales	KY490475	AF497103
Amorphophallus yunnanensis	Amorphophallus	Araceae	Alismatales	AF387423	AF497104
Amorphophallus zenkeri	Amorphophallus	Araceae	Alismatales	AF387424	AF497105
Amparoa beloglossa	Amparoa	Orchidaceae	Asparagales	EU214138	JN589987
Ampelocalamus microphyllus	Ampelocalamus	Poaceae	Poales	JN247081	JN247176
Ampelocera hottlei	Ampelocera	Ulmaceae	Rosales	KC539636	D86314
Ampelocera macphersonii	Ampelocera	Ulmaceae	Rosales	KC539634	KC539703
Ampelocissus thyrsiflora	Ampelocissus	Vitaceae	Vitales	--	AJ402919
Ampelodesmos mauritanicus	Ampelodesmos	Poaceae	Poales	GU254722	AY622885
Ampelopsis arborea	Ampelopsis	Vitaceae	Vitales	KJ772541	AM162542
Ampelopsis cantoniensis	Ampelopsis	Vitaceae	Vitales	KX526799	JF940877
Ampelopsis chaffanjonii	Ampelopsis	Vitaceae	Vitales	JF953239	JF940878
Ampelopsis delavayana	Ampelopsis	Vitaceae	Vitales	JF953241	JF940883
Ampelopsis glandulosa	Ampelopsis	Vitaceae	Vitales	KX950996	AJ419722
Ampelopsis grossedentata	Ampelopsis	Vitaceae	Vitales	JF953244	JF940884
Ampelopsis megalophylla	Ampelopsis	Vitaceae	Vitales	--	AJ402920
Ampelosicyos leandrii	Ampelosicyos	Cucurbitaceae	Cucurbitales	DQ491023	DQ501259
Ampelosycios scandens	Ampelosycios	Cucurbitaceae	Cucurbitales	EF066331	EF066337
Ampelozizyphus amazonicus	Ampelozizyphus	Rhamnaceae	Rosales	--	AJ390037
Amperea xiphoclada	Amperea	Euphorbiaceae	Malpighiales	LK021378	AY794911
Amphiasma benguellense	Amphiasma	Rubiaceae	Gentianales	--	AJ616209
Amphiasma luzuloides	Amphiasma	Rubiaceae	Gentianales	--	AJ288594
Amphiblemma cymosum	Amphiblemma	Melastomataceae	Myrtales	--	AF215543
Amphibolia laevis	Amphibolia	Aizoaceae	Caryophyllales	KF132644	AJ532668
Amphibolis antarctica	Amphibolis	Cymodoceaceae	Alismatales	KF488499	KF488485
Amphibolis griffithii	Amphibolis	Cymodoceaceae	Alismatales	KF488500	HQ901574
Amphibromus fluitans	Amphibromus	Poaceae	Poales	KX873219	AY691631
Amphicarpaea bracteata	Amphicarpaea	Fabaceae	Fabales	MK509412	EU717257
Amphicarpum amphicarpon	Amphicarpum	Poaceae	Poales	HE574029	HE573338
Amphicarpum muhlenbergianum	Amphicarpum	Poaceae	Poales	MH552289	KY627465
Amphidasya ambigua	Amphidasya	Rubiaceae	Gentianales	LN680338	Y11844
Amphiglossa tomentosa	Amphiglossa	Asteraceae	Asterales	--	AM234846
Amphilophium paniculatum	Amphilophium	Bignoniaceae	Lamiales	MG749183	KJ594097
Amphimas ferrugineus	Amphimas	Fabaceae	Fabales	KP177922	--
Amphimas pterocarpoides	Amphimas	Fabaceae	Fabales	KP177921	--
Amphineurion marginatum	Amphineurion	Apocynaceae	Gentianales	MG963253	AJ419730
Amphipogon caricinus	Amphipogon	Poaceae	Poales	NC_035520	NC_035520
Amphipogon strictus	Amphipogon	Poaceae	Poales	--	U88403
Amphipterygium adstringens	Amphipterygium	Anacardiaceae	Sapindales	AY594458	GU935415
Amphirrhox longifolia	Amphirrhox	Violaceae	Malpighiales	FJ514708	FJ038206
Amphiscirpus nevadensis	Amphiscirpus	Cyperaceae	Poales	KP165400	DQ317926
Amphitecna apiculata	Amphitecna	Bignoniaceae	Lamiales	--	AF102640
Amphitecna latifolia	Amphitecna	Bignoniaceae	Lamiales	KJ012460	KJ082117
Amphithalea axillaris	Amphithalea	Fabaceae	Fabales	--	AM180172
Amphithalea biovulata	Amphithalea	Fabaceae	Fabales	--	AM180173
Amphithalea ciliaris	Amphithalea	Fabaceae	Fabales	--	AM180174
Amphithalea cuneifolia	Amphithalea	Fabaceae	Fabales	--	AM180176
Amphithalea ericifolia	Amphithalea	Fabaceae	Fabales	--	AM180177
Amphithalea flava	Amphithalea	Fabaceae	Fabales	--	AM180178
Amphithalea fourcadei	Amphithalea	Fabaceae	Fabales	--	AM180179
Amphithalea imbricata	Amphithalea	Fabaceae	Fabales	--	AM180180
Amphithalea intermedia	Amphithalea	Fabaceae	Fabales	--	AM180181
Amphithalea micrantha	Amphithalea	Fabaceae	Fabales	--	AM180182
Amphithalea monticola	Amphithalea	Fabaceae	Fabales	--	AM180183
Amphithalea muirii	Amphithalea	Fabaceae	Fabales	--	AM180184
Amphithalea muraltioides	Amphithalea	Fabaceae	Fabales	--	AM180185
Amphithalea obtusiloba	Amphithalea	Fabaceae	Fabales	--	AM180186
Amphithalea oppositifolia	Amphithalea	Fabaceae	Fabales	KY118294	AM180187
Amphithalea pageae	Amphithalea	Fabaceae	Fabales	--	AM180188
Amphithalea parvifolia	Amphithalea	Fabaceae	Fabales	--	AM180189
Amphithalea phylicoides	Amphithalea	Fabaceae	Fabales	--	AM180190
Amphithalea rostrata	Amphithalea	Fabaceae	Fabales	--	AM177361
Amphithalea speciosa	Amphithalea	Fabaceae	Fabales	--	AM177362
Amphithalea spinosa	Amphithalea	Fabaceae	Fabales	--	AM177363
Amphithalea stokoei	Amphithalea	Fabaceae	Fabales	--	AM177364
Amphithalea tomentosa	Amphithalea	Fabaceae	Fabales	--	AM177365
Amphithalea tortilis	Amphithalea	Fabaceae	Fabales	--	AM177366
Amphithalea violacea	Amphithalea	Fabaceae	Fabales	--	AM177368
Amphithalea virgata	Amphithalea	Fabaceae	Fabales	--	AM177369
Amphithalea vlokii	Amphithalea	Fabaceae	Fabales	--	AM177370
Amphithalea williamsonii	Amphithalea	Fabaceae	Fabales	--	AM177371
Amphoricarpos autariatus	Amphoricarpos	Asteraceae	Asterales	AY826227	KC589787
Amphoricarpos exsul	Amphoricarpos	Asteraceae	Asterales	AY826228	KC589788
Amphorogyne celastroides	Amphorogyne	Amphorogynaceae	Santalales	EF584614	--
Amsinckia lycopsoides	Amsinckia	Boraginaceae	Boraginales	JQ388521	--
Amsinckia tessellata	Amsinckia	Boraginaceae	Boraginales	KF287777	KF158093
Amsonia elliptica	Amsonia	Apocynaceae	Gentianales	DQ660498	DQ660629
Amsonia tabernaemontana	Amsonia	Apocynaceae	Gentianales	DQ660499	AM295078
Amydrium humile	Amydrium	Araceae	Alismatales	AM920567	AM905745
Amylotheca duthieana	Amylotheca	Loranthaceae	Santalales	EU544413	--
Amyrea sambiranensis	Amyrea	Euphorbiaceae	Malpighiales	LK021379	AY794964
Anabasis aphylla	Anabasis	Amaranthaceae	Caryophyllales	--	HM131745
Anabasis articulata	Anabasis	Amaranthaceae	Caryophyllales	KY941464	HM630092
Anabasis brevifolia	Anabasis	Amaranthaceae	Caryophyllales	--	HM131747
Anabasis elatior	Anabasis	Amaranthaceae	Caryophyllales	--	HM131748
Anabasis eriopoda	Anabasis	Amaranthaceae	Caryophyllales	--	HM131749
Anabasis salsa	Anabasis	Amaranthaceae	Caryophyllales	--	HM131750
Anabasis truncata	Anabasis	Amaranthaceae	Caryophyllales	--	HM131751
Anacampseros albissima	Anacampseros	Anacampserotaceae	Caryophyllales	DQ855856	--
Anacampseros alta	Anacampseros	Anacampserotaceae	Caryophyllales	HQ620844	--
Anacampseros arachnoides	Anacampseros	Anacampserotaceae	Caryophyllales	HQ620845	--
Anacampseros coahuilensis	Anacampseros	Anacampserotaceae	Caryophyllales	AY042661	AY875246
Anacampseros filamentosa	Anacampseros	Anacampserotaceae	Caryophyllales	MK397913	MK397913
Anacampseros karasmontana	Anacampseros	Anacampserotaceae	Caryophyllales	DQ855859	--
Anacampseros kurtzii	Anacampseros	Anacampserotaceae	Caryophyllales	DQ855853	--
Anacampseros marlothii	Anacampseros	Anacampserotaceae	Caryophyllales	HQ620849	--
Anacampseros papyracea	Anacampseros	Anacampserotaceae	Caryophyllales	MF350132	AM235079
Anacampseros pisina	Anacampseros	Anacampserotaceae	Caryophyllales	HQ620850	--
Anacampseros recurvata	Anacampseros	Anacampserotaceae	Caryophyllales	DQ855858	--
Anacampseros retusa	Anacampseros	Anacampserotaceae	Caryophyllales	DQ855860	--
Anacampseros subnuda	Anacampseros	Anacampserotaceae	Caryophyllales	DQ855861	--
Anacampseros telephiastrum	Anacampseros	Anacampserotaceae	Caryophyllales	DQ855862	AY875247
Anacampseros vulcanensis	Anacampseros	Anacampserotaceae	Caryophyllales	AY514851	--
Anacamptis coriophora	Anacamptis	Orchidaceae	Asparagales	MF944940	MF944940
Anacamptis laxiflora	Anacamptis	Orchidaceae	Asparagales	KU697384	KF997401
Anacamptis morio	Anacamptis	Orchidaceae	Asparagales	KF997506	KF997322
Anacamptis pyramidalis	Anacamptis	Orchidaceae	Asparagales	JN895643	JN892999
Anacaona sphaerica	Anacaona	Cucurbitaceae	Cucurbitales	EU036997	EU036995
Anacardium excelsum	Anacardium	Anacardiaceae	Sapindales	MF045475	JQ590134
Anacardium occidentale	Anacardium	Anacardiaceae	Sapindales	NC_035235	AY462008
Anacardium spruceanum	Anacardium	Anacardiaceae	Sapindales	--	FJ037949
Anacolosa clarkii	Anacolosa	Aptandraceae	Santalales	AB924707	AB925747
Anacolosa griffithii	Anacolosa	Aptandraceae	Santalales	AB925209	AB925840
Anacolosa papuana	Anacolosa	Aptandraceae	Santalales	EF464516	DQ790144
Anacyclus valentinus	Anacyclus	Asteraceae	Asterales	GU817419	GU817737
Anadenanthera colubrina	Anadenanthera	Fabaceae	Fabales	EU812064	MG429845
Anadenanthera peregrina	Anadenanthera	Fabaceae	Fabales	MG718804	MG833517
Anagallis arvensis	Anagallis	Primulaceae	Ericales	MG950417	ANSCPRBCL
Anagallis minima	Anagallis	Primulaceae	Ericales	JN894204	HM849772
Anagallis tenella	Anagallis	Primulaceae	Ericales	HM850732	JN890713
Anagyris foetida	Anagyris	Fabaceae	Fabales	KP230735	Z70122
Anamirta cocculus	Anamirta	Menispermaceae	Ranunculales	EF143856	FJ626591
Ananas ananassoides	Ananas	Bromeliaceae	Poales	KU659085	JF280685
Ananas bracteatus	Ananas	Bromeliaceae	Poales	KU258040	JX649343
Ananas comosus	Ananas	Bromeliaceae	Poales	KU659085	MH749074
Anaphalioides bellidioides	Anaphalioides	Asteraceae	Asterales	HM445613	--
Anaphalioides trinervis	Anaphalioides	Asteraceae	Asterales	HM445612	KT626807
Anaphalis margaritacea	Anaphalis	Asteraceae	Asterales	KX677581	HQ589951
Anaphalis triplinervis	Anaphalis	Asteraceae	Asterales	--	JQ933215
Anaphyllopsis americana	Anaphyllopsis	Araceae	Alismatales	AM920575	AM905753
Anarthria gracilis	Anarthria	Anarthriaceae	Poales	KF206012	--
Anarthria humilis	Anarthria	Anarthriaceae	Poales	DQ257497.3	GQ408934
Anarthria laevis	Anarthria	Anarthriaceae	Poales	KF206013	--
Anarthria polyphylla	Anarthria	Anarthriaceae	Poales	DQ257498	AF148760
Anarthria prolifera	Anarthria	Anarthriaceae	Poales	DQ257499	DQ307438
Anarthrophyllum desideratum	Anarthrophyllum	Fabaceae	Fabales	AY386923	--
Anastatica hierochuntica	Anastatica	Brassicaceae	Brassicales	KY912021	MH115438
Anastrabe integerrima	Anastrabe	Stilbaceae	Lamiales	KF147376	KF147454
Anathallis abbreviata	Anathallis	Orchidaceae	Asparagales	JN589954	JN589974
Anathallis anderssonii	Anathallis	Orchidaceae	Asparagales	JF934841	--
Anathallis barbulata	Anathallis	Orchidaceae	Asparagales	KC425856	--
Anathallis burzlaffiana	Anathallis	Orchidaceae	Asparagales	KC425857	--
Anathallis dolichopus	Anathallis	Orchidaceae	Asparagales	JF934840	--
Anathallis lewisiae	Anathallis	Orchidaceae	Asparagales	KC425858	--
Anathallis linearifolia	Anathallis	Orchidaceae	Asparagales	AF265473	--
Anathallis pabstii	Anathallis	Orchidaceae	Asparagales	KC425859	--
Anathallis rabei	Anathallis	Orchidaceae	Asparagales	KC425860	--
Anaxagorea acuminata	Anaxagorea	Annonaceae	Magnoliales	AY220436	AY578121
Anaxagorea crassipetala	Anaxagorea	Annonaceae	Magnoliales	JQ586483	JQ590151
Anaxagorea javanica	Anaxagorea	Annonaceae	Magnoliales	AY518882	AY319075
Anaxagorea luzonensis	Anaxagorea	Annonaceae	Magnoliales	AY518883	AY319074
Anaxagorea panamensis	Anaxagorea	Annonaceae	Magnoliales	GQ981933	GQ981662
Anaxagorea phaeocarpa	Anaxagorea	Annonaceae	Magnoliales	AY238960	AY238952
Anaxagorea silvatica	Anaxagorea	Annonaceae	Magnoliales	AY743477	AY743439
Anaxeton arborescens	Anaxeton	Asteraceae	Asterales	--	AM234847
Ancathia igniaria	Ancathia	Asteraceae	Asterales	KX526531	KC589789
Anchietea pyrifolia	Anchietea	Violaceae	Malpighiales	--	KC699565
Anchietea selloviana	Anchietea	Violaceae	Malpighiales	AB354479	AB354407
Anchomanes difformis	Anchomanes	Araceae	Alismatales	LT995111	AF497108
Anchonium elichrysifolium	Anchonium	Brassicaceae	Brassicales	--	FN594834
Anchusa aegyptiaca	Anchusa	Boraginaceae	Boraginales	EU599709	EU599885
Anchusa arvensis	Anchusa	Boraginaceae	Boraginales	EU599718	EU599894
Anchusa azurea	Anchusa	Boraginaceae	Boraginales	EU599711	EU599887
Anchusa capensis	Anchusa	Boraginaceae	Boraginales	EU599723	AM234924
Anchusa cespitosa	Anchusa	Boraginaceae	Boraginales	EU599721	EU599897
Anchusa crispa	Anchusa	Boraginaceae	Boraginales	EU599733	EU599903
Anchusa formosa	Anchusa	Boraginaceae	Boraginales	EU599724	KF158127
Anchusa officinalis	Anchusa	Boraginaceae	Boraginales	MK509413	JQ933216
Anchusa pusilla	Anchusa	Boraginaceae	Boraginales	EU599716	EU599892
Anchusa strigosa	Anchusa	Boraginaceae	Boraginales	EU599712	EU599888
Anchusa stylosa	Anchusa	Boraginaceae	Boraginales	EU599715	EU599891
Anchusa thessala	Anchusa	Boraginaceae	Boraginales	EU599717	EU599893
Anchusa undulata	Anchusa	Boraginaceae	Boraginales	EU599722	EU599898
Ancistrochilus rothschildianus	Ancistrochilus	Orchidaceae	Asparagales	AF264152	AF264152
Ancistrocladus abbreviatus	Ancistrocladus	Ancistrocladaceae	Caryophyllales	AF204840	--
Ancistrocladus barteri	Ancistrocladus	Ancistrocladaceae	Caryophyllales	GQ470535	--
Ancistrocladus benomensis	Ancistrocladus	Ancistrocladaceae	Caryophyllales	GQ470520	--
Ancistrocladus congolensis	Ancistrocladus	Ancistrocladaceae	Caryophyllales	MH286312	MH286312
Ancistrocladus griffithii	Ancistrocladus	Ancistrocladaceae	Caryophyllales	GQ470515	--
Ancistrocladus guineensis	Ancistrocladus	Ancistrocladaceae	Caryophyllales	GQ470537	--
Ancistrocladus hamatus	Ancistrocladus	Ancistrocladaceae	Caryophyllales	AF204842	--
Ancistrocladus heyneanus	Ancistrocladus	Ancistrocladaceae	Caryophyllales	AF204841	--
Ancistrocladus korupensis	Ancistrocladus	Ancistrocladaceae	Caryophyllales	AF204839	Z97636
Ancistrocladus pachyrrhachis	Ancistrocladus	Ancistrocladaceae	Caryophyllales	GQ470538	--
Ancistrocladus robertsoniorum	Ancistrocladus	Ancistrocladaceae	Caryophyllales	GQ470539	--
Ancistrocladus tanzaniensis	Ancistrocladus	Ancistrocladaceae	Caryophyllales	GQ470540	--
Ancistrocladus tectorius	Ancistrocladus	Ancistrocladaceae	Caryophyllales	NC_041258	AB925293
Ancistrorhynchus capitatus	Ancistrorhynchus	Orchidaceae	Asparagales	DQ091351	--
Ancistrorhynchus cephalotes	Ancistrorhynchus	Orchidaceae	Asparagales	EF655817	--
Ancistrorhynchus metteniae	Ancistrorhynchus	Orchidaceae	Asparagales	DQ091352	--
Ancistrorhynchus paysanii	Ancistrorhynchus	Orchidaceae	Asparagales	EF079268	--
Ancistrorhynchus recurvus	Ancistrorhynchus	Orchidaceae	Asparagales	DQ091354	--
Ancistrorhynchus straussii	Ancistrorhynchus	Orchidaceae	Asparagales	DQ091353	--
Ancistrothyrsus tessmannii	Ancistrothyrsus	Passifloraceae	Malpighiales	AB536618	AB536540
Ancistrotropis firmula	Ancistrotropis	Fabaceae	Fabales	JN008273	--
Ancistrotropis peduncularis	Ancistrotropis	Fabaceae	Fabales	KX087936	KX087468
Andersonia sprengelioides	Andersonia	Ericaceae	Ericales	AF015631	ASU79742
Andira anthelmia	Andira	Fabaceae	Fabales	MG719042	KF981224
Andira inermis	Andira	Fabaceae	Fabales	JF501102	U74199
Andira legalis	Andira	Fabaceae	Fabales	KX816344	--
Andira marauensis	Andira	Fabaceae	Fabales	JX295899	--
Andira surinamensis	Andira	Fabaceae	Fabales	KY118247	JQ625880
Andrachne aspera	Andrachne	Phyllanthaceae	Malpighiales	AY830259	AY830259
Andrachne ephemera	Andrachne	Phyllanthaceae	Malpighiales	AM745768	--
Andrachne fragilis	Andrachne	Phyllanthaceae	Malpighiales	AM745772	--
Andrachne microphylla	Andrachne	Phyllanthaceae	Malpighiales	AM745788	AY663564
Andrachne telephioides	Andrachne	Phyllanthaceae	Malpighiales	MH211043	AY663565
Androcorys pugioniformis	Androcorys	Orchidaceae	Asparagales	MF945499	MF944935
Androcymbium ciliolatum	Androcymbium	Colchicaceae	Liliales	KC796903	KC796852
Androcymbium cruciatum	Androcymbium	Colchicaceae	Liliales	KC899608	KC899438
Androcymbium cuspidatum	Androcymbium	Colchicaceae	Liliales	KC899610	KC899440
Androcymbium dregei	Androcymbium	Colchicaceae	Liliales	JQ404777	JQ404669
Androcymbium eucomoides	Androcymbium	Colchicaceae	Liliales	KC796907	KC796856
Androcymbium europaeum	Androcymbium	Colchicaceae	Liliales	KC796908	KC796857
Androcymbium longipes	Androcymbium	Colchicaceae	Liliales	KC796909	KC796858
Androcymbium orienticapense	Androcymbium	Colchicaceae	Liliales	KC899613	KC899443
Androcymbium scabromarginatum	Androcymbium	Colchicaceae	Liliales	KC899615	KC899445
Androcymbium striatum	Androcymbium	Colchicaceae	Liliales	KC796911	KC796860
Androcymbium volutare	Androcymbium	Colchicaceae	Liliales	KC899618	KC899448
Andrographis paniculata	Andrographis	Acanthaceae	Lamiales	LC461762	JQ922118
Androlepis skinneri	Androlepis	Bromeliaceae	Poales	AY950005	EU219678
Andromeda polifolia	Andromeda	Ericaceae	Ericales	MK509414	AF124572
Andropogon bicornis	Andropogon	Poaceae	Poales	MF998958	MF998305
Andropogon brachystachyus	Andropogon	Poaceae	Poales	MH551704	MH181200
Andropogon gayanus	Andropogon	Poaceae	Poales	NC_040127	NC_040127
Andropogon gerardii	Andropogon	Poaceae	Poales	NC_040111	NC_040111
Andropogon glomeratus	Andropogon	Poaceae	Poales	MH551859	KY627048
Andropogon gyrans	Andropogon	Poaceae	Poales	MH551591	MH181171
Andropogon ternarius	Andropogon	Poaceae	Poales	MH552296	KY627472
Androsace erecta	Androsace	Primulaceae	Ericales	KF907896	AF395004
Androsace sempervivoides	Androsace	Primulaceae	Ericales	AY647535	--
Androsace septentrionalis	Androsace	Primulaceae	Ericales	MF158649	JN965232
Androsace spinulifera	Androsace	Primulaceae	Ericales	KF907894	AJ235772
Androsiphonia adenostegia	Androsiphonia	Passifloraceae	Malpighiales	KC207203	AB536541
Androstachys johnsonii	Androstachys	Picrodendraceae	Malpighiales	AY830361	AJ402922
Androstephium coeruleum	Androstephium	Asparagaceae	Asparagales	JQ276424	JQ273929
Androstoma empetrifolia	Androstoma	Ericaceae	Ericales	AY372597	AY372540
Androstoma verticillata	Androstoma	Ericaceae	Ericales	AY372645	JQ667355
Androtrichum giganteum	Androtrichum	Cyperaceae	Poales	--	EF178546
Androtrichum trigynum	Androtrichum	Cyperaceae	Poales	--	EF178547
Andryala integrifolia	Andryala	Asteraceae	Asterales	HM850614	HM849774
Anechites nerium	Anechites	Apocynaceae	Gentianales	AM295087	AJ419733
Aneilema acuminatum	Aneilema	Commelinaceae	Commelinales	LC323131	KM895556
Aneilema calceolus	Aneilema	Commelinaceae	Commelinales	--	AF036889
Aneilema clarkei	Aneilema	Commelinaceae	Commelinales	--	AF312253
Aneilema neocaledonicum	Aneilema	Commelinaceae	Commelinales	--	AF312252
Anemarrhena asphodeloides	Anemarrhena	Asparagaceae	Asparagales	NC_032698	NC_032698
[truncated: 34,107 more rows]
